# Supplementary material for: Nitrogen concentrations in boreal and temperate tree tissues vary with tree age/size, growth rate, and climate
Source: Copernicus journal article supplement (doi:10.5194/bg-22-1475-2025), 2025-03-18
Supplement: Supplementary file 1 [file bg-22-1475-2025-supplement.pdf]

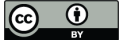

*Supplement of*

## **Nitrogen concentrations in boreal and temperate tree tissues vary with tree age/size, growth rate, and climate**

**Martin Thurner et al.**

*Correspondence to:* Martin Thurner ([martin.thurner@kit.edu](mailto:martin.thurner@kit.edu))

The copyright of individual parts of the supplement might differ from the article licence.

## Supporting Information

### S1 Web of Science search criteria

Keywords:

TS=((stem OR root OR branch OR sapwood OR bole OR trunk OR twig OR xylem)

NEAR nitrogen)

AND

TS=(abies OR acer OR alnus OR betula OR carpinus OR carya OR castanea OR cedrus OR chamaecyparis OR cornus OR cryptomeria OR cupressus OR fagus OR fraxinus OR juglans OR juniperus OR larix OR liriodendron OR lithocarpus OR magnolia OR notholithocarpus OR nyssa OR oxydendrum OR phellodendron OR picea OR pinus OR platanus OR populus OR prunus OR pseudotsuga OR quercus OR robinia OR salix OR sequoia OR sequoiadendron OR sorbus OR taxodium OR thuja OR tilia OR tsuga OR ulmus)

Date of search:

05.04.2020

## S2 Data sources

- Adriaenssens, S.: Dry deposition and canopy exchange for temperate tree species under high nitrogen deposition, PhD thesis, Ghent University, Ghent, Belgium, 209p. pp., 2012.
- Akburak, S., Oral, H. V., Ozdemir, E., and Makineci, E.: Temporal variations of biomass, carbon and nitrogen of roots under different tree species, *Scandinavian Journal of Forest Research*, 28, 8-16, 10.1080/02827581.2012.679680, 2013.
- Alban, D. H. and Pastor, J.: Decomposition of aspen, spruce, and pine boles on two sites in Minnesota, *Canadian Journal of Forest Research*, 23, 1744-1749, 10.1139/x93-220, 1993.
- Albaugh, T. J., Allen, H. L., and Fox, T. R.: Nutrient use and uptake in *Pinus taeda*, *Tree Physiology*, 28, 1083-1098, 10.1093/treephys/28.7.1083, 2008.
- Alriksson, A. and Eriksson, H. M.: Variations in mineral nutrient and C distribution in the soil and vegetation compartments of five temperate tree species in NE Sweden, *Forest Ecology and Management*, 108, 261-273, [https://doi.org/10.1016/S0378-1127\(98\)00230-8](https://doi.org/10.1016/S0378-1127(98)00230-8), 1998.
- Andre, F., Jonard, M., and Ponette, Q.: Biomass and nutrient content of sessile oak (*Quercus petraea* (Matt.) Liebl.) and beech (*Fagus sylvatica* L.) stem and branches in a mixed stand in southern Belgium, *Sci Total Environ*, 408, 2285-2294, 10.1016/j.scitotenv.2010.02.040, 2010.
- André, F. and Ponette, Q.: Comparison of biomass and nutrient content between oak (*Quercus petraea*) and hornbeam (*Carpinus betulus*) trees in a coppice-with-standards stand in Chimay (Belgium), *Annals of Forest Science*, 60, 489-502, 10.1051/forest:2003042, 2003.
- Aosaar, J., Varik, M., Lõhmus, K., Ostonen, I., Becker, H., and Uri, V.: Long-term study of above- and below-ground biomass production in relation to nitrogen and carbon accumulation dynamics in a grey alder (*Alnus incana* (L.) Moench) plantation on former agricultural land, *European Journal of Forest Research*, 132, 737-749, 10.1007/s10342-013-0706-1, 2013.
- Aosaar, J., Mander, Ü., Varik, M., Becker, H., Morozov, G., Maddison, M., and Uri, V.: Biomass production and nitrogen balance of naturally afforested silver birch (*Betula pendula* Roth.) stand in Estonia, *Silva Fennica*, 50, 10.14214/sf.1628, 2016.
- Aosaar, J., Varik, M., Becker, H., Morozov, G., Aun, K., Kukumägi, M., Padari, A., and Uri, V.: Soil respiration and nitrogen leaching decreased in grey alder (*Alnus incana* (L.) Moench) coppice after clear-cut, *Scandinavian Journal of Forest Research*, 34, 445-457, 10.1080/02827581.2019.1610189, 2019.
- Armolaitis, K., Aleinikoviene, J., Baniuniene, A., Lubyte, J., and Zekaite, V.: Carbon sequestration and nitrogen status in Arenosols following afforestation or following abandonment of arable land, *Baltic Forestry*, 13, 169-178, 2007.
- Arthur, M. A. and Fahey, T. J.: Biomass and nutrients in an Engelmann spruce–subalpine fir forest in north central Colorado: pools, annual production, and internal cycling, *Canadian Journal of Forest Research*, 22, 315-325, 10.1139/x92-041, 1992.
- Atkin, O. K., Bloomfield, K. J., Reich, P. B., Tjoelker, M. G., Asner, G. P., Bonal, D., Bonisch, G., Bradford, M. G., Cernusak, L. A., Cosio, E. G., Creek, D., Crous, K. Y., Domingues, T. F., Dukes, J. S., Egerton, J. J., Evans, J. R., Farquhar, G. D., Fyllas, N. M., Gauthier, P. P., Gloor, E., Gimeno, T. E., Griffin, K. L., Guerrieri, R., Heskell, M. A., Huntingford, C., Ishida, F. Y., Kattge, J., Lambers, H., Liddell, M. J., Lloyd, J., Lusk, C. H.,

Martin, R. E., Maksimov, A. P., Maximov, T. C., Malhi, Y., Medlyn, B. E., Meir, P., Mercado, L. M., Mirotnick, N., Ng, D., Niinemets, U., O'Sullivan, O. S., Phillips, O. L., Poorter, L., Poot, P., Prentice, I. C., Salinas, N., Rowland, L. M., Ryan, M. G., Sitch, S., Slot, M., Smith, N. G., Turnbull, M. H., VanderWel, M. C., Valladares, F., Veneklaas, E. J., Weerasinghe, L. K., Wirth, C., Wright, I. J., Wythers, K. R., Xiang, J., Xiang, S., and Zaragoza-Castells, J.: Global variability in leaf respiration in relation to climate, plant functional types and leaf traits, *New Phytol*, 206, 614-636, 10.1111/nph.13253, 2015.

Bantle, A., Borken, W., Ellerbrock, R. H., Schulze, E. D., Weisser, W. W., and Matzner, E.: Quantity and quality of dissolved organic carbon released from coarse woody debris of different tree species in the early phase of decomposition, *Forest Ecology and Management*, 329, 287-294, 10.1016/j.foreco.2014.06.035, 2014.

Barbaroux, C., Bréda, N., and Dufrêne, E.: Distribution of above-ground and below-ground carbohydrate reserves in adult trees of two contrasting broad-leaved species (*Quercus petraea* and *Fagus sylvatica*), *New Phytologist*, 157, 605-615, <https://doi.org/10.1046/j.1469-8137.2003.00681.x>, 2003.

Bauer, G. A., Persson, H., Persson, T., Mund, M., Hein, M., Kummetz, E., Matteucci, G., van Oene, H., Scarascia-Mugnozza, G., and Schulze, E.-D.: Linking Plant Nutrition and Ecosystem Processes, in: *Carbon and Nitrogen Cycling in European Forest Ecosystems*, edited by: Schulze, E.-D., *Ecological Studies*, 142, Springer, Berlin, 63-98, 2000.

Bazilevich, N. I. and Titlyanova, A. A.: Biotic turnover of five continents: element exchange processes in terrestrial natural ecosystems, SB RAS, Novosibirsk, Russia, 376 p. pp.2008.

Belkacem, S., Nys, C., and Gelhaye, D.: Effets d'une fertilisation et d'un amendement sur l'immobilisation d'éléments dans la biomasse d'un peuplement adulte d'épicéa commun (*Picea abies* L Karst), *Annales des sciences forestières*, 49, 235-252, 1992.

Berg, B. and Ekbohm, G.: Litter mass-loss rates and decomposition patterns in some needle and leaf litter types. Long-term decomposition in a Scots pine forest. VII, *Canadian Journal of Botany*, 69, 1449-1456, 10.1139/b91-187, 1991.

Berg, B., Ekbohm, G., and McClaugherty, C.: Lignin and holocellulose relations during long-term decomposition of some forest litters. Long-term decomposition in a Scots pine forest. IV, *Canadian Journal of Botany*, 62, 2540-2550, 10.1139/b84-345, 1984.

Binkley, D.: Nitrogen fixation and net primary production in a young Sitka alder stand, *Canadian Journal of Botany*, 60, 281-284, 10.1139/b82-036, 1982.

Binkley, D.: Ecosystem production in Douglas-fir plantations: Interaction of red alder and site fertility, *Forest Ecology and Management*, 5, 215-227, [https://doi.org/10.1016/0378-1127\(83\)90073-7](https://doi.org/10.1016/0378-1127(83)90073-7), 1983.

Binkley, D., Lousier, J. D., and Cromack, K., Jr.: Ecosystem Effects of Sitka Alder in a Douglas-fir Plantation, *Forest Science*, 30, 26-35, 10.1093/forestscience/30.1.26, 1984.

Birk, E. M. and Vitousek, P. M.: Nitrogen Availability and Nitrogen Use Efficiency in Loblolly Pine Stands, *Ecology*, 67, 69-79, 10.2307/1938504, 1986.

Bornkamm, R. and Bennert, H. W.: Gehalt und Vorrat organischer Inhaltsstoffe in der Baumschicht von Luzulo-Fagetum-Beständen im Solling (BRD) 1) 1) Ergebnisse des „Solling-Projektes der Deutschen Forschungsgemeinschaft“ (Internationales Biologisches Programm): Mitteilung Nr. 340. Herrn Prof. Dr. H. Meusel zum 80. Geburtstag gewidmet, *Flora*, 183, 133-148, 10.1016/s0367-2530(17)31549-9, 1989.

Brais, S., Paré, D., and Lierman, C.: Tree bole mineralization rates of four species of the Canadian eastern boreal forest: implications for nutrient dynamics following stand-replacing disturbances, *Canadian Journal of Forest Research*, 36, 2331-2340, 10.1139/x06-136, 2006.

Bringmark, L.: Nutrient cycle in tree stands - Nordic symposium, *Silva Fennica*, 11, 201-257, doi:10.14214/sf.a14830, 1977.

Brix, H.: Effects of nitrogen fertilizer source and application rates on foliar nitrogen concentration, photosynthesis, and growth of Douglas-fir, *Canadian Journal of Forest Research*, 11, 775-780, 10.1139/x81-111, 1981.

Brozek, S.: Effect of soil changes caused by red alder (*Alnus rubra*) on biomass and nutrient status of Douglas-fir (*Pseudotsugamenziesii*) seedlings, *Canadian Journal of Forest Research*, 20, 1320-1325, 10.1139/x90-175, 1990.

Buchmann, N., Schulze, E.-D., and Gebauer, G.: 15N-ammonium and 15N-nitrate uptake of a 15-year-old *Picea abies* plantation, *Oecologia*, 102, 361-370, 10.1007/BF00329803, 1995.

Buchmann, N., Oren, R., Gebauer, G., Dietrich, P., and Schulze, E.-D.: The use of stable isotopes in ecosystem research. First results of a field study with 15N, *Isotopenpraxis Isotopes in Environmental and Health Studies*, 28, 51-59, 10.1080/00211919208050821, 1992.

Calfapietra, C., Angelis, P. d., Gielen, B., Lukac, M., Moscatelli, M. C., Avino, G., Lagomarsino, A., Polle, A., Ceulemans, R., Mugnozza, G. S., Hoosbeek, M. R., and Cotrufo, M. F.: Increased nitrogen-use efficiency of a short-rotation poplar plantation in elevated CO<sub>2</sub> concentration, *Tree Physiology*, 27, 1153-1163, 10.1093/treephys/27.8.1153, 2007.

Campetella, G., Botta-Dukát, Z., Wellstein, C., Canullo, R., Gatto, S., Chelli, S., Mucina, L., and Bartha, S.: Patterns of plant trait–environment relationships along a forest succession chronosequence, *Agriculture, Ecosystems & Environment*, 145, 38-48, 10.1016/j.agee.2011.06.025, 2011.

Cerasino, L. and La Porta, N.: Allocation of five macroelements and quality of fuels derived from Norway spruce wood obtained by thinning operations, *Biomass and Bioenergy*, 70, 553-556, 10.1016/j.biombioe.2014.08.006, 2014.

Ceschia, É., Damesin, C., Lebaube, S., Pontailier, J.-Y., and Dufrière, É.: Spatial and seasonal variations in stem respiration of beech trees (*Fagus sylvatica*), *Annals of Forest Science*, 59, 801-812, 10.1051/forest:2002078, 2002.

Chen, Y., Han, W., Tang, L., Tang, Z., and Fang, J.: Leaf nitrogen and phosphorus concentrations of woody plants differ in responses to climate, soil and plant growth form, *Ecography*, 36, 178-184, 10.1111/j.1600-0587.2011.06833.x, 2011.

Chen, J., Heikkinen, J., Hobbie, E. A., Rinne-Garmston, K. T., Penttila, R., and Makipaa, R.: Strategies of carbon and nitrogen acquisition by saprotrophic and ectomycorrhizal fungi in Finnish boreal *Picea abies*-dominated forests, *Fungal Biol*, 123, 456-464, 10.1016/j.funbio.2019.03.005, 2019.

Classen, A. T., Chapman, S. K., Whitham, T. G., Hart, S. C., and Koch, G. W.: Genetic-based plant resistance and susceptibility traits to herbivory influence needle and root litter nutrient dynamics, *Journal of Ecology*, 95, 1181-1194, 10.1111/j.1365-2745.2007.01297.x, 2007.

Cobb, W. R., Will, R. E., Daniels, R. F., and Jacobson, M. A.: Aboveground biomass and nitrogen in four short-rotation woody crop species growing with different water and nutrient availabilities, *Forest Ecology and Management*, 255, 4032-4039, 10.1016/j.foreco.2008.03.045, 2008.

Cole, D. W. and Rapp, M. (Eds.): Elemental cycling in forest ecosystems, Dynamic properties of forest ecosystems. International Biological Programme Synthesis, 23, Cambridge University Press, Cambridge, UK, 341-409 pp., 1980.

Cong, Y., Li, M.-H., Liu, K., Dang, Y.-C., Han, H.-D., and He, H. S.: Decreased Temperature with Increasing Elevation Decreases the End-Season Leaf-to-Wood Reallocation of Resources in Deciduous *Betula ermanii* Cham. *Trees, Forests*, 10, 10.3390/f10020166, 2019.

Cornelissen, J. H. C., Cerabolini, B., Castro-Díez, P., Villar-Salvador, P., Montserrat-Martí, G., Puyravaud, J. P., Maestro, M., Werger, M. J. A., and Aerts, R.: Functional traits of woody plants: correspondence of species rankings between field adults and laboratory-grown seedlings?, *Journal of Vegetation Science*, 14, 311-322, <https://doi.org/10.1111/j.1654-1103.2003.tb02157.x>, 2003.

Cotrufo, C.: Xylem nitrogen as a possible diagnostic nitrogen test for loblolly pine, *Canadian Journal of Forest Research*, 13, 355-357, 10.1139/x83-053, 1983.

Craine, J. M., Elmore, A. J., Aidar, M. P. M., Bustamante, M., Dawson, T. E., Hobbie, E. A., Kahmen, A., Mack, M. C., McLauchlan, K. K., Michelsen, A., Nardoto, G. B., Pardo, L. H., Penuelas, J., Reich, P. B., Schuur, E. A. G., Stock, W. D., Templer, P. H., Virginia, R. A., Welker, J. M., and Wright, I. J.: Global patterns of foliar nitrogen isotopes and their relationships with climate, mycorrhizal fungi, foliar nutrient concentrations, and nitrogen availability, *New Phytol*, 183, 980-992, 10.1111/j.1469-8137.2009.02917.x, 2009.

Dahlin, K. M., Asner, G. P., and Field, C. B.: Environmental and community controls on plant canopy chemistry in a Mediterranean-type ecosystem, *Proc Natl Acad Sci U S A*, 110, 6895-6900, 10.1073/pnas.1215513110, 2013.

Dawson, J. O. and Funk, D. T.: Seasonal Change in Foliar Nitrogen Concentration of *Alnus Glutinosa*, *Forest Science*, 27, 239-243, 10.1093/forestscience/27.2.239, 1981.

Delagrangé, S., Messier, C., Lechowicz, M. J., and Dizengremel, P.: Physiological, morphological and allocational plasticity in understory deciduous trees: importance of plant size and light availability, *Tree Physiology*, 24, 775-784, 10.1093/treephys/24.7.775, 2004.

Denaeyer - De Smet, S.: Contents in biogenic elements of the plant covers in the deciduous forests of Europe, in: Productivity of forest ecosystems. Proceedings of the Brussels symposium organized by Unesco und the International Biological Programme (27-31 October 1969), edited by: Duvigneaud, P., Unesco, Paris, 515-525, 1971.

Devine, W. D., Harrington, T. B., Terry, T. A., Harrison, R. B., Slesak, R. A., Peter, D. H., Harrington, C. A., Shilling, C. J., and Schoenholtz, S. H.: Five-year vegetation control effects on aboveground biomass and nitrogen content and allocation in Douglas-fir plantations on three contrasting sites, *Forest Ecology and Management*, 262, 2187-2198, 10.1016/j.foreco.2011.08.010, 2011.

Dewit, L. and Reid, D. M.: Branch Abscission in Balsam Poplar (*Populus balsamifera*): Characterization of the Phenomenon and the Influence of Wind, *International Journal of Plant Sciences*, 153, 556-564, 1992.

Doucet, A., Savard, M. M., Begin, C., and Smirnoff, A.: Is wood pre-treatment essential for tree-ring nitrogen concentration and isotope analysis?, *Rapid Commun Mass Spectrom*, 25, 469-475, 10.1002/rcm.4876, 2011.

Doucet, A., Savard, M. M., Bégin, C., and Smirnoff, A.: Tree-ring  $\delta^{15}\text{N}$  values to infer air quality changes at regional scale, *Chemical Geology*, 320-321, 9-16, 10.1016/j.chemgeo.2012.05.011, 2012.

- Du, Z., Cai, X., Bao, W., Chen, H., Pan, H., Wang, X., Zhao, Q., Zhu, W., Liu, X., Jiang, Y., and Li, M.-H.: Short-Term vs. Long-Term Effects of Understory Removal on Nitrogen and Mobile Carbohydrates in Overstory Trees, *Forests*, 7, 10.3390/f7030067, 2016.
- Duvigneaud, P. and Denaeyer - De Smet, S.: Biological Cycling of Minerals in Temperate Deciduous Forests, in: *Analysis of Temperate Forest Ecosystems*, edited by: Reichle, D. E., Springer Berlin Heidelberg, Berlin, Heidelberg, 199-225, 10.1007/978-3-642-85587-0\_14, 1973.
- Ebermann, R. and Stich, K.: Distribution and Seasonal Variation of Wood Peroxidase Activity in Oak (*Quercus Robur*) Wood and Fiber Science, 17, 391-396, 1985.
- Edmonds, R. L.: Decomposition rates and nutrient dynamics in small-diameter woody litter in four forest ecosystems in Washington, U.S.A, *Canadian Journal of Forest Research*, 17, 499-509, 10.1139/x87-084, 1987.
- Egnell, G., Jurevics, A., and Peichl, M.: Negative effects of stem and stump harvest and deep soil cultivation on the soil carbon and nitrogen pools are mitigated by enhanced tree growth, *Forest Ecology and Management*, 338, 57-67, 10.1016/j.foreco.2014.11.006, 2015.
- Ellsworth, D. S. and Reich, P. B.: Leaf Mass Per Area, Nitrogen Content and Photosynthetic Carbon Gain in *Acer saccharum* Seedlings in Contrasting Forest Light Environments, *Functional Ecology*, 6, 423-435, 10.2307/2389280, 1992.
- Eriksson, H. M. and Rosen, K.: Nutrient distribution in a Swedish tree species experiment, *Plant and Soil*, 164, 51-59, 10.1007/BF00010110, 1994.
- Eriksson, H. M., Berdén, M., Rosén, K., and Nilsson, S. I.: Nutrient distribution in a Norway spruce stand after long-term application of ammonium nitrate and superphosphate, *Water, Air, and Soil Pollution*, 92, 451-467, 10.1007/BF00283572, 1996.
- Fahey, T. J., Yavitt, J. B., Pearson, J. A., and Knight, D. H.: The nitrogen cycle in lodgepole pine forests, southeastern Wyoming, *Biogeochemistry*, 1, 257-275, 10.1007/BF02187202, 1985.
- Feger, K. H., Raspe, S., Schmid, M., and Zöttl, H. W.: Verteilung der Elementvorräte in einem schlechtwüchsigen 100jährigen Fichtenbestand auf Buntsandstein, *Forstwissenschaftliches Centralblatt vereinigt mit Tharandter forstliches Jahrbuch*, 110, 248-262, 1991.
- Feng, Z., Brumme, R., Xu, Y. J., and Lamersdorf, N.: Tracing the fate of mineral N compounds under high ambient N deposition in a Norway spruce forest at Solling/Germany, *Forest Ecology and Management*, 255, 2061-2073, 10.1016/j.foreco.2007.12.049, 2008.
- Finér, L.: Nutrient concentrations in *Pinus sylvestris* growing on an ombrotrophic pine bog, and the effects of PK and NPK fertilization, *Scandinavian Journal of Forest Research*, 7, 205-218, 10.1080/02827589209382713, 2008.
- Fogel, R. and Hunt, G.: Contribution of mycorrhizae and soil fungi to nutrient cycling in a Douglas-fir ecosystem, *Canadian Journal of Forest Research*, 13, 219-232, 10.1139/x83-031, 1983.
- Fornes, R. H., Berglund, J. V., and Leaf, A. L.: A comparison of the growth and nutrition of *Picea abies* (L.) karst. and *Pinus resinosa* ait. on a K-deficient site subjected to K fertilization, *Plant and Soil*, 33, 345-360, 10.1007/BF01378227, 1970.
- Freschet, G. T., Cornelissen, J. H. C., Van Logtestijn, R. S. P., and Aerts, R.: Evidence of the 'plant economics spectrum' in a subarctic flora, *Journal of Ecology*, 98, 362-373, 10.1111/j.1365-2745.2009.01615.x, 2010.
- Gower, S. T. and Richards, J. H.: Larches: Deciduous Conifers in an Evergreen World, *BioScience*, 40, 818-826, 10.2307/1311484, 1990.

- Grier, C. C., Cole, D. W., Dyrness, C. T., and Fredriksen, R. L.: Nutrient cycling in 37- and 450-year-old Douglas-fir ecosystems, in: Integrated research in the coniferous forest biome, edited by: Waring, R. H., and Edmonds, R. L., Coniferous Forest Biome, Seattle, WA, 21-34, 1974.
- Haavik, L. J., Ayres, M. P., Stange, E. E., and Stephen, F. M.: Phloem and xylem nitrogen variability in *Quercus rubra* attacked by *Enaphalodes rufulus*, *The Canadian Entomologist*, 143, 380-383, 10.4039/n11-016, 2012.
- Han, W., Chen, Y., Zhao, F. J., Tang, L., Jiang, R., and Zhang, F.: Floral, climatic and soil pH controls on leaf ash content in China's terrestrial plants, *Global Ecology and Biogeography*, 21, 376-382, 10.1111/j.1466-8238.2011.00677.x, 2011.
- Heijari, J., Nerg, A. M., Kainulainen, P., Noldt, U., Levula, T., Raitio, H., and Holopainen, J. K.: Effect of long-term forest fertilization on Scots pine xylem quality and wood borer performance, *J Chem Ecol*, 34, 26-31, 10.1007/s10886-007-9395-x, 2008.
- Heilman, P. E. and Gessel, S. P.: The Effect of Nitrogen Fertilization on the Concentration and Weight of Nitrogen, Phosphorus, and Potassium in Douglas-Fir Trees, *Soil Science Society of America Journal*, 27, 102-105, <https://doi.org/10.2136/sssaj1963.03615995002700010034x>, 1963.
- Hellsten, S., Helmisaari, H.-S., Melin, Y., Skovsgaard, J. P., Kaakinen, S., Kukkola, M., Saarsalmi, A., Petersson, H., and Akselsson, C.: Nutrient concentrations in stumps and coarse roots of Norway spruce, Scots pine and silver birch in Sweden, Finland and Denmark, *Forest Ecology and Management*, 290, 40-48, 10.1016/j.foreco.2012.09.017, 2013.
- Helmisaari, H.-S.: Nutrient cycling in *Pinus sylvestris* stands in eastern Finland, in: Nutrient Uptake and Cycling in Forest Ecosystems. Proceedings of the CEC/IUFRO Symposium in Halmstad, Sweden, June, 7-10, 1993, edited by: Nilsson, L. O., Hüttel, R. F., and Johansson, U. T., *Developments in Plant and Soil Sciences*, 62, Springer, 327-336, 1995.
- Hu, B., Zhou, M., Bilela, S., Simon, J., Dannenmann, M., Liu, X., Alfarraj, S., Hou, L., Chen, H., Zhang, S., Butterbach-Bahl, K., and Rennenberg, H.: Nitrogen nutrition of native and introduced forest tree species in N-limited ecosystems of the Qinling Mountains, China, *Trees*, 31, 1189-1202, 10.1007/s00468-017-1537-3, 2017.
- Hunt, H. W., Ingham, E. R., Coleman, D. C., Elliott, E. T., and Reid, C. P. P.: Nitrogen Limitation of Production and Decomposition in Prairie, Mountain Meadow, and Pine Forest, *Ecology*, 69, 1009-1016, 10.2307/1941256, 1988.
- Huss-Danell, K. and Ohlsson, H.: Distribution of biomass and nitrogen among plant parts and soil nitrogen in a young *Alnus incana* stand, *Canadian Journal of Botany*, 70, 1545-1549, 10.1139/b92-194, 1992.
- Iivonen, S., Kaakinen, S., Jolkkonen, A., Vapaavuori, E., and Linder, S.: Influence of long-term nutrient optimization on biomass, carbon, and nitrogen acquisition and allocation in Norway spruce, *Canadian Journal of Forest Research*, 36, 1563-1571, 10.1139/x06-035, 2006.
- Jach, M.: Above- and Below-ground Production of Young Scots Pine (*Pinus sylvestris* L.) Trees after Three Years of Growth in the Field under Elevated CO<sub>2</sub>, *Annals of Botany*, 85, 789-798, 10.1006/anbo.2000.1138, 2000.
- Jacobson, S., Högbom, L., Ring, E., and Nohrstedt, H.-Ö.: The distribution of logging residues and its impact on seedling establishment and early plant growth in two Norway spruce stands, *Scandinavian Journal of Forest Research*, 32, 134-141, 10.1080/02827581.2016.1194456, 2016.



Jacquet, J.-S., Bosc, A., O'Grady, A. P., and Jactel, H.: Pine growth response to processionary moth defoliation across a 40-year chronosequence, *Forest Ecology and Management*, 293, 29-38, 10.1016/j.foreco.2012.12.003, 2013.

Jose, S. and Gillespie, A. R.: Aboveground production efficiency and canopy nutrient contents of mixed-hardwood forest communities along a moisture gradient in the central United States, *Canadian Journal of Forest Research*, 26, 2214-2223, 10.1139/x26-250, 1996.

Jyske, T., Kaakinen, S., Nilsson, U., Saranpää, P., and Vapaavuori, E.: Effects of timing and intensity of thinning on wood structure and chemistry in Norway spruce, *Holzforschung*, 64, 10.1515/hf.2010.013, 2010.

Kaakinen, S., Saranpää, P., and Vapaavuori, E.: Effects of growth differences due to geographic location and N-fertilisation on wood chemistry of Norway spruce, *Trees*, 21, 131-139, 10.1007/s00468-006-0103-1, 2006.

Kaakinen, S., Piispanen, R., Lehto, S., Metsometsä, J., Nilsson, U., Saranpää, P., Linder, S., and Vapaavuori, E.: Growth, wood chemistry, and fibre length of Norway spruce in a long-term nutrient optimization experiment, *Canadian Journal of Forest Research*, 39, 410-419, 10.1139/x08-180, 2009.

Kayama, M., Makoto, K., Nomura, M., Satoh, F., and Koike, T.: Nutrient dynamics and carbon partitioning in larch seedlings (*Larix kaempferi*) regenerated on serpentine soil in northern Japan, *Landscape and Ecological Engineering*, 5, 125-135, 10.1007/s11355-009-0069-4, 2009.

Kim, C.: Carbon and Nitrogen Distribution of Tree Components in *Larix kaempferi* Carriere and *Quercus variabilis* Blume Stands in Gyeongnam Province, *Journal of Korean Society of Forest Science*, 108, 139-146, 10.14578/JKFS.2019.108.2.139, 2019.

Kim, C., Yoo, B. O., Jung, S. Y., and Lee, K. S.: Allometric equations to assess biomass, carbon and nitrogen content of black pine and red pine trees in southern Korea, *iForest - Biogeosciences and Forestry*, 10, 483-490, 10.3832/ifor2164-010, 2017.

King, J. S., Giardina, C. P., Pregitzer, K. S., and Friend, A. L.: Biomass partitioning in red pine (*Pinus resinosa*) along a chronosequence in the Upper Peninsula of Michigan, *Canadian Journal of Forest Research*, 37, 93-102, 10.1139/x06-217, 2007.

Kloppel, B. D., Gower, S. T., Treichel, I. W., and Kharuk, S.: Foliar Carbon Isotope Discrimination in *Larix* Species and Sympatric Evergreen Conifers: A Global Comparison, *Oecologia*, 114, 153-159, 1998.

Kostecki, J., Kostecki, J., Drab, M., Szafraniec, M., Stodulski, G., Wypych, M., Greinert, A., and Wasylewicz, R.: The total content of nitrogen in leaves and wood of trees growing in the area affected by the Głogów Copper Smelter, *Journal of Elementology*, 10.5601/jelem.2014.19.4.401, 2014.

Kostiainen, K., Kaakinen, S., Saranpää, P., Sigurdsson, B. D., Linder, S., and Vapaavuori, E.: Effect of elevated [CO<sub>2</sub>] on stem wood properties of mature Norway spruce grown at different soil nutrient availability, *Global Change Biology*, 10, 1526-1538, 10.1111/j.1365-2486.2004.00821.x, 2004.

Krutul, D., Zielenkiewicz, T., Zawadzki, J., Radomski, A., Antczak, A., Drożdżek, M., Kłosińska, T., and Makowski, T.: Non-metals accumulation in Scots pine (*Pinus sylvestris* L.) wood and bark affected with environmental pollution, *Wood Research*, 60, 655-662, 2015.

Kull, O., Koppel, A., and Noormets, A.: Seasonal changes in leaf nitrogen pools in two *Salix* species, *Tree Physiology*, 18, 45-51, 10.1093/treephys/18.1.45, 1998.

Kuznetsova, T., Lukjanova, A., Mandre, M., and Lõhmus, K.: Aboveground biomass and nutrient accumulation dynamics in young black alder, silver birch and Scots pine plantations on reclaimed oil shale mining areas in Estonia, *Forest Ecology and Management*, 262, 56-64, 10.1016/j.foreco.2010.09.030, 2011.

Lahr, E. C. and Krokene, P.: Conifer stored resources and resistance to a fungus associated with the spruce bark beetle *Ips typographus*, PLoS One, 8, e72405, 10.1371/journal.pone.0072405, 2013.

Lahr, E. C. and Sala, A.: Species, elevation, and diameter affect whitebark pine and lodgepole pine stored resources in the sapwood and phloem: implications for bark beetle outbreaks, Canadian Journal of Forest Research, 44, 1312-1319, 10.1139/cjfr-2014-0063, 2014.

Lang, G. E., Reiners, W. A., and Shellito, G. A.: Tissue chemistry of *Abies balsamea* and *Betula papyrifera* var. *cordifolia* from subalpine forests of northeastern United States, Canadian Journal of Forest Research, 12, 311-318, 10.1139/x82-045, 1982.

Larocque, G., R.: Performance and morphological response of the hybrid poplar DN-74 (*Populus deltoides* x *nigra*) under different spacings on a 4-year rotation, Ann. For. Sci., 56, 275-287, 1999.

Larocque, G. R.: Performance of young jack pine trees originating from two different branch angle traits under different intensities of competition, Ann. For. Sci., 57, 635-649, 2000.

Laughlin, D. C., Leppert, J. J., Moore, M. M., and Sieg, C. H.: A multi-trait test of the leaf-height-seed plant strategy scheme with 133 species from a pine forest flora, Functional Ecology, 24, 493-501, 10.1111/j.1365-2435.2009.01672.x, 2010.

Laughlin, D. C., Fulé, P. Z., Huffman, D. W., Crouse, J., and Laliberté, E.: Climatic constraints on trait-based forest assembly, Journal of Ecology, 99, 1489-1499, 10.1111/j.1365-2745.2011.01885.x, 2011.

Lee, W. Y., Park, E.-J., and Han, S. U.: Correlation of Growth Performance with Total Nitrogen, Carbon and Nitrogen Isotope Compositions in the Xylem of *Pinus koraiensis*, Jour. Korean For. Soc., 99, 353-358, 2010.

Lee, H.-S., Park, Y.-W., Lee, H.-Y., Choi, S.-G., and Koo, C.-D.: Changes of nutrient contents in the log of *Quercus acutissima* by cutting period for *Lentinula edodes* log cultivation, Forest Science and Technology, 14, 33-40, 10.1080/21580103.2017.1421589, 2018.

Li, H., Crabbe, M. J. C., Xu, F., Wang, W., Ma, L., Niu, R., Gao, X., Li, X., Zhang, P., Ma, X., and Chen, H.: Seasonal variations in carbon, nitrogen and phosphorus concentrations and C:N:P stoichiometry in different organs of a *Larix principis-rupprechtii* Mayr. plantation in the Qinling Mountains, China, PLoS One, 12, e0185163, 10.1371/journal.pone.0185163, 2017.

Likens, G. E. and Bormann, F. H.: Chemical Analyses of Plant Tissues from the Hubbard Brook Ecosystem in New Hampshire, 1970.

Little, S. N. and Shainsky, L. J.: Distribution of biomass and nutrients in lodgepole pine/bitterbrush ecosystems in central Oregon, 1992.

Liu, S.: Nitrogen cycling and dynamic analysis of man made larch forest ecosystem, in: Nutrient Uptake and Cycling in Forest Ecosystems. Proceedings of the CEC/IUFRO Symposium in Halmstad, Sweden, June, 7-10, 1993, edited by: Nilsson, L. O., Hüttl, R. F., and Johansson, U. T., Developments in Plant and Soil Sciences, 62, Springer, 391-397, 1995.

Liu, S. and Wang, H.: N, P, and K characteristics of different age groups of temperate coniferous tree species in northwestern China, Journal of Forestry Research, 29, 471-478, 10.1007/s11676-017-0442-3, 2017.

Loewenstein, H. and Pitkin, F. H.: Growth responses and nutrient relations of fertilized and unfertilized grand fir, University of Idaho. Forest, Wildlife and Range Experiment Station, Moscow, ID, 13 p., 1971.

Luken, J. O. and Fonda, R. W.: Nitrogen accumulation in a chronosequence of red alder communities along the Hoh River, Olympic National Park, Washington, Canadian Journal of Forest Research, 13, 1228-1237, 10.1139/x83-161, 1983.

- Lukeš, P., Stenberg, P., Rautiainen, M., Mõttus, M., and Vanhatalo, K. M.: Optical properties of leaves and needles for boreal tree species in Europe, *Remote Sensing Letters*, 4, 667-676, 10.1080/2150704x.2013.782112, 2013.
- Maier, C. A.: Stem growth and respiration in loblolly pine plantations differing in soil resource availability, *Tree Physiology*, 21, 1183-1193, 10.1093/treephys/21.16.1183, 2001.
- Maire, V., Wright, I. J., Prentice, I. C., Batjes, N. H., Bhaskar, R., van Bodegom, P. M., Cornwell, W. K., Ellsworth, D., Niinemets, Ü., Ordonez, A., Reich, P. B., and Santiago, L. S.: Global effects of soil and climate on leaf photosynthetic traits and rates, *Global Ecology and Biogeography*, 24, 706-717, 10.1111/geb.12296, 2015.
- Major, J. E., Johnsen, K. H., Barsi, D. C., Campbell, M., and Malcolm, J. W.: Stem biomass, C and N partitioning and growth efficiency of mature pedigreed black spruce on both a wet and a dry site, *Forest Ecology and Management*, 310, 495-507, 10.1016/j.foreco.2013.08.019, 2013.
- Mälkönen, E.: Annual primary production and nutrient cycle in some Scots pine stands, *Communicationes Instituti Forestalis Fenniae*, 84, 1-87, 1974.
- Mälkönen, E.: Annual primary production and nutrient cycle in a birch stand, *Communicationes Instituti Forestalis Fenniae*, 91, 1-35, 1977.
- Mandre, M., Korsjukov, R., and Ots, K.: Effect of wood ash application on the biomass distribution and physiological state of Norway spruce seedlings on sandy soils, *Plant and Soil*, 265, 301-314, 2004.
- Mandre, M., Klõšeiko, J., Lukjanova, A., and Tullus, H.: Variation of carbohydrates and lignin in hybrid aspen (*Populus tremula* x *P. tremuloides*) on alkaline soil, *Cellulose Chemistry and Technology*, 45, 299-311, 2011.
- Martin, J. G. and Bolstad, P. V.: Annual soil respiration in broadleaf forests of northern Wisconsin: influence of moisture and site biological, chemical, and physical characteristics, *Biogeochemistry*, 73, 149-182, 10.1007/s10533-004-5166-8, 2005.
- Martin, A. R., Gezahegn, S., and Thomas, S. C.: Variation in carbon and nitrogen concentration among major woody tissue types in temperate trees, *Canadian Journal of Forest Research*, 45, 744-757, 10.1139/cjfr-2015-0024, 2015.
- Martin, J. G., Kloeppe, B. D., Schaefer, T. L., Kimbler, D. L., and McNulty, S. G.: Aboveground biomass and nitrogen allocation of ten deciduous southern Appalachian tree species, *Canadian Journal of Forest Research*, 28, 1648-1659, 10.1139/x98-146, 1998.
- Matyssek, R. and Schulze, E.-D.: Heterosis in hybrid larch (*Larix decidua* x *leptolepis*). I. The role of leaf characteristics, *Trees*, 1, 219-224, 10.1007/BF01816819, 1987.
- Mei, L., Xiong, Y., Gu, J., Wang, Z., and Guo, D.: Whole-tree dynamics of non-structural carbohydrate and nitrogen pools across different seasons and in response to girdling in two temperate trees, *Oecologia*, 177, 333-344, 10.1007/s00442-014-3186-1, 2015.
- Meier, C. E., Grier, C. C., and Cole, D. W.: Below- and Aboveground N and P Use by *Abies amabilis* Stands, *Ecology*, 66, 1928-1942, 10.2307/2937389, 1985.
- Meir, P., Kruijt, B., Broadmeadow, M., Barbosa, E., Kull, O., Carswell, F., Nobre, A., and Jarvis, P. G.: Acclimation of photosynthetic capacity to irradiance in tree canopies in relation to leaf nitrogen concentration and leaf mass per unit area, *Plant, Cell & Environment*, 25, 343-357, <https://doi.org/10.1046/j.0016-8025.2001.00811.x>, 2002.
- Merilä, P., Mustajärvi, K., Helmisaari, H.-S., Hilli, S., Lindroos, A.-J., Nieminen, T. M., Nöjd, P., Rautio, P., Salemaa, M., and Ukonmaanaho, L.: Above- and below-ground N stocks in coniferous boreal forests in Finland:

Implications for sustainability of more intensive biomass utilization, *Forest Ecology and Management*, 311, 17-28, 10.1016/j.foreco.2013.06.029, 2014.

Merrill, W. and Cowling, E. B.: Role of nitrogen in wood deterioration: amounts and distribution of nitrogen in tree stems, *Canadian Journal of Botany*, 44, 1555-1580, 10.1139/b66-168, 1966.

Mfarrej, M. F. B. and Sharaf, N. S.: Host Selection of Peach Rootborer *Capnodis tenebrionis* L. (Coleoptera: Buprestidae) to Stone-Fruit Trees in Jordan, *Jordan Journal of Agricultural Sciences*, 7, 682-689, 2011.

Milla, R. and Reich, P. B.: Multi-trait interactions, not phylogeny, fine-tune leaf size reduction with increasing altitude, *Ann Bot*, 107, 455-465, 10.1093/aob/mcq261, 2011.

Mitchell, A. K., Barclay, H. J., Brix, H., Pollard, D. F. W., Benton, R., and deJong, R.: Biomass and nutrient element dynamics in Douglas-fir: effects of thinning and nitrogen fertilization over 18 years, *Canadian Journal of Forest Research*, 26, 376-388, 10.1139/x26-042, 1996.

Mori, A. S., Shiono, T., Haraguchi, T. F., Ota, A. T., Koide, D., Ohgue, T., Kitagawa, R., Maeshiro, R., Aung, T. T., Nakamori, T., Hagiwara, Y., Matsuoka, S., Ikeda, A., Hishi, T., Hobara, S., Mizumachi, E., Frisch, A., Thor, G., Fujii, S., Osono, T., and Gustafsson, L.: Functional redundancy of multiple forest taxa along an elevational gradient: predicting the consequences of non-random species loss, *Journal of Biogeography*, 42, 1383-1396, 10.1111/jbi.12514, 2015.

Morrison, I. K.: Dry-matter and Element Content of Roots of Several Natural Stands of *Pinus banksiana* Lamb. in Northern Ontario, *Canadian Journal of Forest Research*, 4, 61-64, 10.1139/x74-008, 1974.

Mussche, S., Bussche, B., De Schrijver, A., Neiryneck, J., Nachtergale, L., and Lust, N.: Nutrient uptake of a mixed oak/beech forest in Flanders (Belgium), *Silva Gandavensis* 63, 120-133, 1998.

Naidu, S. L., DeLucia, E. H., and Thomas, R. B.: Contrasting patterns of biomass allocation in dominant and suppressed loblolly pine, *Canadian Journal of Forest Research*, 28, 1116-1124, 10.1139/x98-083, 1998.

Ne'eman, G., Goubitz, S., Werger, M. J., and Shmida, A.: Relationships between tree size, crown shape, gender segregation and sex allocation in *Pinus halepensis*, a Mediterranean pine tree, *Ann Bot*, 108, 197-206, 10.1093/aob/mcr104, 2011.

Nihlgård, B.: Plant Biomass, Primary Production and Distribution of Chemical Elements in a Beech and a Planted Spruce Forest in South Sweden, *Oikos*, 23, 69-81, 10.2307/3543928, 1972.

Nihlgård, B. and Lindgren, L.: Plant Biomass, Primary Production and Bioelements of Three Mature Beech Forests in South Sweden, *Oikos*, 28, 95-104, 10.2307/3543328, 1977.

Niinemets, Ü.: Global-Scale Climatic Controls of Leaf Dry Mass per Area, Density, and Thickness in Trees and Shrubs, *Ecology*, 82, 453-469, 10.2307/2679872, 2001.

Noh, N. J., Son, Y., Kim, R. H., Seo, K. W., Koo, J. W., Park, I. H., Lee, Y. J., Lee, K. H., and Son, Y. M.: Biomass accumulations and the distribution of nitrogen and phosphorus within three *Quercus acutissima* stands in central Korea, *Journal of Plant Biology*, 50, 461-466, 10.1007/BF03030683, 2007.

Nordborg, F., Nilsson, U., Gemmel, P., and Örlander, G.: Carbon and nitrogen stocks in soil, trees and field vegetation in conifer plantations 10 years after deep soil cultivation and patch scarification, *Scandinavian Journal of Forest Research*, 21, 356-363, 10.1080/02827580600976615, 2007.

Nykvist, N.: The Effect of Clear Felling on the Distribution of Biomass and Nutrients, *Bulletins from the Ecological Research Committee*, 14, 166-178, 1971.

- Nys, C., Ranger, D., and Ranger, J.: Etude comparative de deux écosystèmes forestiers feuillus et résineux des Ardennes primaires françaises. III. - Minéralomasse et cycle biologique, *Annales des sciences forestières*, 40, 41-66, 1983.
- Ordonez, J. C., van Bodegom, P. M., Witte, J. P., Bartholomeus, R. P., van Hal, J. R., and Aerts, R.: Plant strategies in relation to resource supply in mesic to wet environments: does theory mirror nature?, *Am Nat*, 175, 225-239, 10.1086/649582, 2010.
- Oren, R., Werk, K. S., Schulze, E. D., Meyer, J., Schneider, B. U., and Schramel, P.: Performance of Two *Picea abies* (L.) Karst. Stands at Different Stages of Decline. VI. Nutrient Concentration, *Oecologia*, 77, 151-162, 1988.
- Ovington, J. D. and Madgwick, H. A. I.: Distribution of Organic Matter and Plant Nutrients in a Plantation of Scots Pine, *Forest Science*, 5, 344-355, 10.1093/forestscience/5.4.344, 1959.
- Park, B. B., Yanai, R. D., Sahm, J. M., Lee, D. K., and Abrahamson, L. P.: Wood ash effects on plant and soil in a willow bioenergy plantation, *Biomass and Bioenergy*, 28, 355-365, 10.1016/j.biombioe.2004.09.001, 2005.
- Perala, D. A. and Alban, D. H.: Biomass, nutrient distribution and litterfall in *Populus*, *Pinus* and *Picea* stands on two different soils in Minnesota, *Plant and Soil*, 64, 177-192, 1982.
- Phillips, T. and Watmough, S. A.: A nutrient budget for a selection harvest: implications for long-term sustainability, *Canadian Journal of Forest Research*, 42, 2064-2077, 10.1139/cjfr-2012-0224, 2012.
- Pierce, S., Brusa, G., Vagge, I., Cerabolini, B. E. L., and Thompson, K.: Allocating CSR plant functional types: the use of leaf economics and size traits to classify woody and herbaceous vascular plants, *Functional Ecology*, 27, 1002-1010, 10.1111/1365-2435.12095, 2013.
- Ponette, Q., Ranger, J., Ottorini, J.-M., and Ulrich, E.: Aboveground biomass and nutrient content of five Douglas-fir stands in France, *Forest Ecology and Management*, 142, 109-127, [https://doi.org/10.1016/S0378-1127\(00\)00345-5](https://doi.org/10.1016/S0378-1127(00)00345-5), 2001.
- Portsmouth, A., Niinemets, Ü., Truus, L., and Pensa, M.: Biomass allocation and growth rates in *Pinus sylvestris* are interactively modified by nitrogen and phosphorus availabilities and by tree size and age, *Canadian Journal of Forest Research*, 35, 2346-2359, 10.1139/x05-155, 2005.
- Pozdnyakov, L. K., Protopopov, V. V., and Gorbatenko, V. M.: Biological productivity of forests in Middle Siberia and Yakutia, Krasnoyarsk, Russia, 152 p. pp.1969.
- Prentice, I. C., Meng, T., Wang, H., Harrison, S. P., Ni, J., and Wang, G.: Evidence of a universal scaling relationship for leaf CO<sub>2</sub> drawdown along an aridity gradient, *New Phytol*, 190, 169-180, 10.1111/j.1469-8137.2010.03579.x, 2011.
- Preston, K. A., Cornwell, W. K., and Denoyer, J. L.: Wood density and vessel traits as distinct correlates of ecological strategy in 51 California coast range angiosperms, *New Phytol*, 170, 807-818, 10.1111/j.1469-8137.2006.01712.x, 2006.
- Prokushkin, A. S.: Nitrogen concentration of *Larix gmelinii* near Tura, Russia [dataset], unpublished.
- Prokushkin, A., Hagedorn, F., Pokrovsky, O., Viers, J., Kirilyanov, A., Masyagina, O., Prokushkina, M., and McDowell, W.: Permafrost Regime Affects the Nutritional Status and Productivity of Larches in Central Siberia, *Forests*, 9, 10.3390/f9060314, 2018.
- Pyttel, P. L., Köhn, M., and Bauhus, J.: Effects of different harvesting intensities on the macro nutrient pools in aged oak coppice forests, *Forest Ecology and Management*, 349, 94-105, 10.1016/j.foreco.2015.03.037, 2015.

Quested, H. M., Cornelissen, J. H. C., Press, M. C., Callaghan, T. V., Aerts, R., Trosien, F., Riemann, P., Gwynn-Jones, D., Kondratchuk, A., and Jonasson, S. E.: Decomposition of Sub-Arctic Plants with Differing Nitrogen Economies: A Functional Role for Hemiparasites, *Ecology*, 84, 3209-3221, 2003.

Ranger, J. and Gelhaye, D.: Belowground biomass and nutrient content in a 47-year-old Douglas-fir plantation, *Annales des sciences forestières*, 58, 423-430, 2001.

Ranger, J., Marques, R., Colin-Belgrand, M., Flammang, N., and Gelhaye, D.: The dynamics of biomass and nutrient accumulation in a Douglas-fir (*Pseudotsuga menziesii* Franco) stand studied using a chronosequence approach, *Forest Ecology and Management*, 72, 167-183, [https://doi.org/10.1016/0378-1127\(94\)03469-D](https://doi.org/10.1016/0378-1127(94)03469-D), 1995.

Ranger, J., Cuirin, G., Bouchon, J., Colin, M., Gelhaye, D., and Ahamed, D. M.: Biomasse et minéralomasse d'une plantation d'épicéa commun (*Picea abies* Karst) de forte production dans les Vosges (France), *Annales des sciences forestières*, 49, 651-668, 1992.

Redmon, L. A., Rouquette, F. M., Smith, G. R., Florence, M. J., and Stuth, J. W.: Interseeded legumes with loblolly pine. I. Effect of phosphorus and legume variety on pine seedling establishment and mortality, *Journal of Plant Nutrition*, 20, 1755-1764, 10.1080/01904169709365372, 1997.

Reich, P. B., Oleksyn, J., and Wright, I. J.: Leaf phosphorus influences the photosynthesis-nitrogen relation: a cross-biome analysis of 314 species, *Oecologia*, 160, 207-212, 10.1007/s00442-009-1291-3, 2009.

Reich, P. B., Kloeppel, B. D., Ellsworth, D. S., and Walters, M. B.: Different Photosynthesis-Nitrogen Relations in Deciduous Hardwood and Evergreen Coniferous Tree Species, *Oecologia*, 104, 24-30, 1995.

Reich, P. B., Tjoelker, M. G., Pregitzer, K. S., Wright, I. J., Oleksyn, J., and Machado, J. L.: Scaling of respiration to nitrogen in leaves, stems and roots of higher land plants, *Ecol Lett*, 11, 793-801, 10.1111/j.1461-0248.2008.01185.x, 2008.

Rodriguez-Calcerrada, J., Lopez, R., Salomon, R., Gordaliza, G. G., Valbuena-Carabana, M., Oleksyn, J., and Gil, L.: Stem CO<sub>2</sub> efflux in six co-occurring tree species: underlying factors and ecological implications, *Plant Cell Environ*, 38, 1104-1115, 10.1111/pce.12463, 2015.

Rørsberg, I., Frank, J., and Stuanes, A. O.: Effects of liming and fertilization on tree growth and nutrient cycling in a Scots pine ecosystem in Norway, *Forest Ecology and Management*, 237, 191-207, 10.1016/j.foreco.2006.09.045, 2006.

Rose, A. K. and Nicholas, N. S.: Coarse Woody Debris in a Southern Appalachian Spruce-fir Forest of the Great Smoky Mountains National Park, *Natural Areas Journal*, 28, 342-355, 10.3375/0885-8608(2008)28[342:Cwdias]2.0.Co;2, 2008.

Royer-Tardif, S., Delagrange, S., Nolet, P., and Rivest, D.: Using Macronutrient Distributions within Trees to Define a Branch Diameter Threshold for Biomass Harvest in Sugar Maple-Dominated Stands, *Forests*, 8, 10.3390/f8020041, 2017.

Sala, A., Hopping, K., McIntire, E. J. B., Delzon, S., and Crone, E. E.: Masting in whitebark pine (*Pinus albicaulis*) depletes stored nutrients, *New Phytol*, 196, 189-199, 10.1111/j.1469-8137.2012.04257.x, 2012.

Santa Regina, I.: Organic matter distribution and nutrient fluxes within a sweet chestnut (*Castanea sativa* Mill.) stand of the Sierra de Gata, Spain, *Ann. For. Sci.*, 57, 691-700, 2000.

Santa Regina, I., Tarazona, T., and Calvo, R.: Aboveground biomass in a beech forest and a Scots pine plantation in the Sierra de la Demanda area of northern Spain, *Ann. For. Sci.*, 54, 261-269, 1997.

Saurer, M., Cherubini, P., Ammann, M., De Cinti, B., and Siegwolf, R.: First detection of nitrogen from NO<sub>x</sub> in tree rings: a <sup>15</sup>N/<sup>14</sup>N study near a motorway, *Atmospheric Environment*, 38, 2779-2787, 10.1016/j.atmosenv.2004.02.037, 2004.

Scherer-Lorenzen, M., Schulze, E.-D., Don, A., Schumacher, J., and Weller, E.: Exploring the functional significance of forest diversity: A new long-term experiment with temperate tree species (BIOTREE), *Perspectives in Plant Ecology, Evolution and Systematics*, 9, 53-70, 10.1016/j.ppees.2007.08.002, 2007.

Schowalter, T. D. and Morrell, J. J.: Nutritional Quality of Douglas-Fir Wood: Effect of Vertical and Horizontal Position on Nutrient Levels, *Wood and Fiber Science*, 34, 158-164, 2002.

Schröder, J., Klinner, S., and Körner, M.: A new set of biomass functions for *Quercus petraea* in Western Pomerania, *Baltic Forestry*, 23, 449-462, 2017.

Schulze, E.-D., Schulze, W., Koch, H., Arneth, A., Bauer, G., Kelliher, F. M., Hollinger, D. Y., Vygodskaya, N. N., Kusnetsova, W. A., Sogatchev, A., Ziegler, W., Kobak, K. I., and Issajev, A.: Aboveground biomass and nitrogen nutrition in a chronosequence of pristine Dahurian *Larix* stands in eastern Siberia, *Canadian Journal of Forest Research*, 25, 943-960, 10.1139/x95-103, 1995.

Seidel, F., Lopez C, M. L., Oikawa, A., and Yamanaka, T.: Seasonal nitrogen partitioning in Japanese cedar (*Cryptomeria japonica*, D. Don) tissues, *Plant and Soil*, 442, 511-529, 10.1007/s11104-019-04178-8, 2019a.

Seidel, F., Lopez C, M. L., Celi, L., Bonifacio, E., Oikawa, A., and Yamanaka, T.: N Isotope Fractionation in Tree Tissues During N Reabsorption and Remobilization in *Fagus crenata* Blume, *Forests*, 10, 10.3390/f10040330, 2019b.

Sicard, C., Saint-Andre, L., Gelhaye, D., and Ranger, J.: Effect of initial fertilisation on biomass and nutrient content of Norway spruce and Douglas-fir plantations at the same site, *Trees*, 20, 229-246, 10.1007/s00468-005-0030-6, 2006.

Silvestri, N., Giannini, V., and Antichi, D.: Intercropping cover crops with a poplar short rotation coppice: Effects on nutrient uptake and biomass production, *Italian Journal of Agronomy*, 126-133, 10.4081/ija.2018.934, 2018.

Son, Y. and Gower, S. T.: Nitrogen and phosphorus distribution for five plantation species in southwestern Wisconsin, *Forest Ecology and Management*, 53, 175-193, [https://doi.org/10.1016/0378-1127\(92\)90042-8](https://doi.org/10.1016/0378-1127(92)90042-8), 1992.

Sprugel, D. G.: Density, Biomass, Productivity, and Nutrient-Cycling Changes During Stand Development in Wave-Regenerated Balsam Fir Forests, *Ecological Monographs*, 54, 165-186, 10.2307/1942660, 1984.

Stewart, C. M., Van Deelen, T. R., and Dawson, J. O.: Autumn Herbivory by White-Tailed Deer and Nutrient Loss in Planted Seedlings, *The American Midland Naturalist*, 160, 342-349, 10.1674/0003-0031(2008)160[342:Ahbwda]2.0.Co;2, 2008.

Stockfors, J. and Linder, S.: Effect of nitrogen on the seasonal course of growth and maintenance respiration in stems of Norway spruce trees, *Tree Physiology*, 18, 155-166, 10.1093/treephys/18.3.155, 1998.

Svoboda, M., Matějka, K., and Kopáček, J.: Biomass and element pools of selected spruce trees in the catchments of Plešné and Čertovo Lakes in the Šumava Mts, *Journal of Forest Science*, 52, 482-495, 10.17221/4529-jfs, 2006.

Tamminen, P., Saarsalmi, A., and Kukkola, M.: Amount of boron in Norway spruce stands in eastern Finland, *Forest Ecology and Management*, 269, 92-98, 10.1016/j.foreco.2011.12.032, 2012.

Terziev, N., Boutelje, J., and Larsson, K.: Seasonal fluctuations of low-molecular-weight sugars, starch and nitrogen in sapwood of *Pinus sylvestris* L, *Scandinavian Journal of Forest Research*, 12, 216-224, 10.1080/02827589709355403, 2008.

Thiébeau, P. and Bertrand, I.: Production de biomasse et immobilisation de carbone et d'azote sur des sols marginaux: cas de taillis à très courte rotation conduits sans fertilisation, *Biotechnologie, Agronomie, Société et Environnement / Biotechnology, Agronomy, Society and Environment*, 24, 1-13, 2020.

Tognetti, R., Johnson, J. D., Michelozzi, M., and Raschi, A.: Response of foliar metabolism in mature trees of *Quercus pubescens* and *Quercus ilex* to long-term elevated CO<sub>2</sub>, *Environmental and Experimental Botany*, 39, 233-245, [https://doi.org/10.1016/S0098-8472\(98\)00013-6](https://doi.org/10.1016/S0098-8472(98)00013-6), 1998.

Tomlinson, G., Siegwolf, R. T., Buchmann, N., Schleppi, P., Waldner, P., and Weber, P.: The mobility of nitrogen across tree-rings of Norway spruce (*Picea abies* L.) and the effect of extraction method on tree-ring  $\delta(1)(5)\text{N}$  and  $\delta(1)(3)\text{C}$  values, *Rapid Commun Mass Spectrom*, 28, 1258-1264, 10.1002/rcm.6897, 2014.

Tsutsumi, T.: Accumulation and circulation of nutrient elements in forest ecosystems, in: *Productivity of forest ecosystems. Proceedings of the Brussels symposium organized by Unesco und the International Biological Programme (27-31 October 1969)*, edited by: Duvigneaud, P., Unesco, Paris, 543-552, 1971.

Turner, J. and Singer, M. J.: Nutrient Distribution and Cycling in a Sub-Alpine Coniferous Forest Ecosystem, *Journal of Applied Ecology*, 13, 295-301, 10.2307/2401949, 1976.

Turner, J., Cole, D. W., and Gessel, S. P.: Mineral Nutrient Accumulation and Cycling in a Stand of Red Alder (*Alnus Rubra*), *Journal of Ecology*, 64, 965-974, 10.2307/2258818, 1976.

Uchytlova, T., Krejza, J., Vesela, B., Holub, P., Urban, O., Horacek, P., and Klem, K.: Ultraviolet radiation modulates C:N stoichiometry and biomass allocation in *Fagus sylvatica* saplings cultivated under elevated CO<sub>2</sub> concentration, *Plant Physiol Biochem*, 134, 103-112, 10.1016/j.plaphy.2018.07.038, 2019.

Uri, V., Lõhmus, K., Ostonen, I., Tullus, H., Lastik, R., and Vildo, M.: Biomass production, foliar and root characteristics and nutrient accumulation in young silver birch (*Betula pendula* Roth.) stand growing on abandoned agricultural land, *European Journal of Forest Research*, 126, 495-506, 10.1007/s10342-007-0171-9, 2007.

Varik, M., Aosaar, J., Ostonen, I., Lõhmus, K., and Uri, V.: Carbon and nitrogen accumulation in belowground tree biomass in a chronosequence of silver birch stands, *Forest Ecology and Management*, 302, 62-70, 10.1016/j.foreco.2013.03.033, 2013.

Vergutz, L., Manzoni, S., Porporato, A., Novais, R. F., and Jackson, R. B.: Global resorption efficiencies and concentrations of carbon and nutrients in leaves of terrestrial plants, *Ecological Monographs*, 82, 205-220, <https://doi.org/10.1890/11-0416.1>, 2012.

Vogt, K. A., Grier, C. C., Meier, C. E., and Edmonds, R. L.: Mycorrhizal Role in Net Primary Production and Nutrient Cycling in *Abies Amabilis* Ecosystems in Western Washington, *Ecology*, 63, 370-380, 10.2307/1938955, 1982.

Voigt, G. K. and Steucek, G. L.: Nitrogen Distribution and Accretion in an Alder Ecosystem, *Soil Science Society of America Journal*, 33, 946-949, <https://doi.org/10.2136/sssaj1969.03615995003300060041x>, 1969.

Voronin, P. Y., Mukhin, V. A., Velivetskaya, T. A., Ignat'ev, A. V., and Kuznetsov, V. V.: Isotope composition of carbon and nitrogen in tissues and organs of *Betula pendula*, *Russian Journal of Plant Physiology*, 64, 184-189, 10.1134/s1021443717010174, 2017.



- Wang, H., Chen, D., and Sun, X.: Nutrient Allocation to Different Compartments of Age-Sequence Larch Plantations in China, *Forests*, 10, 10.3390/f10090759, 2019.
- Węgiel, A., Bieliniś, E., and Polowy, K.: Macronutrient Stocks in Scots Pine Stands of Different Densities, *Forests*, 9, 10.3390/f9100593, 2018.
- Wei, H., Xu, C., Ma, L., Duan, J., Jiang, L., and Ren, J.: Effect of Late-Season Fertilization on Nutrient Reserves and Carbohydrate Accumulation in Barerootlarix Olgensisseedlings, *Journal of Plant Nutrition*, 37, 279-293, 10.1080/01904167.2013.859697, 2014.
- Weigt, R. B., Haberle, K. H., Millard, P., Metzger, U., Ritter, W., Blaschke, H., Gottlein, A., and Matyssek, R.: Ground-level ozone differentially affects nitrogen acquisition and allocation in mature European beech (*Fagus sylvatica*) and Norway spruce (*Picea abies*) trees, *Tree Physiol*, 32, 1259-1273, 10.1093/treephys/tps087, 2012.
- Wielgolaski, F. E., Kjelvik, S., and Kallio, P.: Mineral Content of Tundra and Forest Tundra Plants in Fennoscandia, in: *Fennoscandian Tundra Ecosystems: Part 1 Plants and Microorganisms*, edited by: Wielgolaski, F. E., Springer Berlin Heidelberg, Berlin, Heidelberg, 316-332, 10.1007/978-3-642-80937-8\_36, 1975.
- Willis, C. G., Halina, M., Lehman, C., Reich, P. B., Keen, A., McCarthy, S., and Cavender-Bares, J.: Phylogenetic community structure in Minnesota oak savanna is influenced by spatial extent and environmental variation, *Ecography*, 33, 565-577, 10.1111/j.1600-0587.2009.05975.x, 2010.
- Wilson, K. B., Baldocchi, D. D., and Hanson, P. J.: Spatial and seasonal variability of photosynthetic parameters and their relationship to leaf nitrogen in a deciduous forest, *Tree Physiology*, 20, 565-578, 10.1093/treephys/20.9.565, 2000.
- Wirth, C., Schulze, E.-D., Lühker, B., Grigoriev, S., Siry, M., Harges, G., Ziegler, W., Backor, M., Bauer, G., and Vygodskaya, N. N.: Fire and site type effects on the long-term carbon and nitrogen balance in pristine Siberian Scots pine forests, *Plant and Soil*, 242, 41-63, 2002.
- Wittwer, R. F. and Stringer, J. W.: Biomass production and nutrient accumulation in seedling and coppice hardwood plantations, *Forest Ecology and Management*, 13, 223-233, [https://doi.org/10.1016/0378-1127\(85\)90036-2](https://doi.org/10.1016/0378-1127(85)90036-2), 1985.
- Woodwell, G. M., Whittaker, R. H., and Houghton, R. A.: Nutrient Concentrations in Plants in the Brookhaven Oak-Pine Forest, *Ecology*, 56, 318-332, 10.2307/1934963, 1975.
- Wright, T. W. and Will, G. M.: The nutrient content of Scots and Corsican pines growing on sand dunes, *Forestry: An International Journal of Forest Research*, 31, 13-25, 10.1093/forestry/31.1.13, 1958.
- Wullschleger, S. D., Norby, R. J., Love, J. C., and Runck, C.: Energetic Costs of Tissue Construction in Yellow-poplar and White Oak Trees Exposed to Long-term CO<sub>2</sub> Enrichment, *Annals of Botany*, 80, 289-297, <https://doi.org/10.1006/anbo.1997.0434>, 1997.
- Xiao, Y., Peng, F., Dang, Z., Jiang, X., Zhang, J., Zhang, Y., and Shu, H.: Influence of rhizosphere ventilation on soil nutrient status, root architecture and the growth of young peach trees, *Soil Science and Plant Nutrition*, 61, 775-787, 10.1080/00380768.2015.1045404, 2015.
- Xiao, Y., Peng, Y., Peng, F., Zhang, Y., Yu, W., Sun, M., and Gao, X.: Effects of concentrated application of soil conditioners on soil-air permeability and absorption of nitrogen by young peach trees, *Soil Science and Plant Nutrition*, 64, 423-432, 10.1080/00380768.2018.1439697, 2018.
- Xu, L. and Baldocchi, D. D.: Seasonal trends in photosynthetic parameters and stomatal conductance of blue oak (*Quercus douglasii*) under prolonged summer drought and high temperature, *Tree Physiology*, 23, 865-877, 10.1093/treephys/23.13.865, 2003.

Yan, C. F., Gessler, A., Rigling, A., Dobbertin, M., Han, X. G., and Li, M. H.: Effects of mistletoe removal on growth, N and C reserves, and carbon and oxygen isotope composition in Scots pine hosts, *Tree Physiol*, 36, 562-575, 10.1093/treephys/tpw024, 2016.

Yao, X. and Liu, Q.: Responses in Some Growth and Mineral Elements of Mono Maple Seedlings to Enhanced Ultraviolet-B and to Nitrogen Supply, *Journal of Plant Nutrition*, 32, 772-784, 10.1080/01904160902787875, 2009.

Yeo, J.-K., Lee, W.-W., Koo, Y.-B., Woo, K.-S., and Byun, J.-K.: Nitrogen Storage Potential in Aboveground Biomass of Three-year-old Poplar Clones in a Riparian Area, *Journal of Agriculture & Life Science*, 44, 15-21, 2010.

Yguel, B., Bailey, R., Tosh, N. D., Vialatte, A., Vasseur, C., Vitrac, X., Jean, F., and Prinzing, A.: Phytophagy on phylogenetically isolated trees: why hosts should escape their relatives, *Ecol Lett*, 14, 1117-1124, 10.1111/j.1461-0248.2011.01680.x, 2011.

Youssefi, F., Brown, P., and Weinbaum, S.: Relationship between tree nitrogen status, xylem and phloem sap amino acid concentrations, and apparent soil nitrogen uptake by almond trees (*Prunus dulcis*), *The Journal of Horticultural Science and Biotechnology*, 75, 62-68, 10.1080/14620316.2000.11511201, 2015.

Zhao, Q., Liu, X.-y., and Zeng, D.-h.: Aboveground biomass and nutrient allocation in an age-sequence of *Larix olgensis* plantations, *Journal of Forestry Research*, 22, 71-76, 10.1007/s11676-011-0128-1, 2011.

Zhao, K., Zheng, M., Fahey, T. J., Jia, Z., and Ma, L.: Vertical gradients and seasonal variations in the stem CO<sub>2</sub> efflux of *Larix principis-rupprechtii* Mayr, *Agricultural and Forest Meteorology*, 262, 71-80, 10.1016/j.agrformet.2018.07.003, 2018.

### **S3 Classification of tree species into Growth / Leaf type classes**

#### **Broadleaf deciduous, fast-growing**

*Acer campestre*, *Acer davidii*, *Acer macrophyllum*, *Acer negundo*, *Acer negundo* subsp. *californicum*, *Acer pictum*, *Acer platanoides*, *Acer pseudoplatanus*, *Acer rubrum*, *Aesculus hippocastanum*, *Alnus cordata*, *Alnus glutinosa*, *Alnus hirsuta*, *Alnus incana*, *Alnus incana* subsp. *rugosa*, *Alnus rhombifolia*, *Alnus rubra*, *Alnus rugosa*, *Betula alleghaniensis*, *Betula ermanii*, *Betula lenta*, *Betula nigra*, *Betula papyrifera*, *Betula pendula*, *Betula platyphylla*, *Betula platyphylla* subsp. *mandshurica*, *Betula populifolia*, *Betula pubescens*, *Betula tortuosa*, *Betula utilis*, *Betula verrucosa*, *Cornus alternifolia*, *Cornus controversa*, *Cornus walteri*, *Fraxinus americana*, *Fraxinus angustifolia*, *Fraxinus angustifolia* subsp. *oxycarpa*, *Fraxinus excelsior*, *Fraxinus pennsylvanica*, *Juglans mandshurica*, *Juglans nigra*, *Liquidambar styraciflua*, *Platanus occidentalis*, *Populus alba*, *Populus balsamifera*, *Populus cathayana*, *Populus deltoides*, *Populus deltoides* subsp. *monilifera*, *Populus euphratica*, *Populus fremontii*, *Populus gileadensis*, *Populus grandidentata*, *Populus hopeiensis*, *Populus koreana*, *Populus nigra*, *Populus robusta*, *Populus simonii*, *Populus suaveolens*, *Populus tremula*, *Populus tremula* var. *Davidiana*, *Populus tremula* x *tremuloides*, *Populus tremuloides*, *Populus trichocarpa*, *Prunus avium*, *Prunus pennsylvanica*, *Prunus persica*, *Prunus serotina*, *Prunus virginiana*, *Quercus cerris*, *Quercus dentata*, *Quercus lobata*, *Quercus nigra*, *Quercus rubra*, *Quercus texana*, *Robinia pseudoacacia*, *Robinia pseudoacacia* var. *Inermis*, *Salix amygdaloides*, *Salix atrocinerea*, *Salix babylonica*, *Salix bebbiana*, *Salix caprea*, *Salix cinerea*, *Salix dunnii*, *Salix eleagnos* subsp. *eleagnos*, *Salix fragilis*, *Salix hultenii*, *Salix lasiolepis*, *Salix lucida*, *Salix lucida* ssp. *lasiandra*, *Salix pentandra*, *Salix rorida*, *Salix triandra*, *Salix udensis*, *Salix viminalis*, *Sorbus alnifolia*, *Sorbus torminalis*, *Ulmus glabra*, *Ulmus minor*, *Ulmus pumila*

#### **Broadleaf deciduous, slow-/medium-growing**

*Acer buergerianum*, *Acer caudatum* subsp. *ukurundense*, *Acer davidii* subsp. *grosseri*, *Acer japonicum*, *Acer mandshuricum*, *Acer monspessulanum*, *Acer opalus*, *Acer opalus* subsp. *obtusatum*, *Acer palmatum*, *Acer pennsylvanicum*, *Acer pseudosieboldianum*, *Acer saccharum*, *Acer saccharum* subsp. *floridanum*, *Acer spicatum*, *Acer tataricum* subsp. *ginnala*, *Acer tegmentosum*, *Acer truncatum*, *Aesculus californica*, *Betula albosinensis*, *Betula costata*, *Betula dahurica*, *Carpinus betulus*, *Carya alba*, *Carya glabra*, *Carya ovata*, *Castanea dentata*, *Castanea mollissima*, *Castanea sativa*, *Cornus florida*, *Cornus kousa* subsp. *chinensis*, *Cornus kousa* subsp. *kousa*, *Cornus macrophylla*, *Cornus mas*, *Cornus officinalis*, *Fagus crenata*, *Fagus grandifolia*, *Fagus sylvatica*, *Fraxinus chinensis*, *Fraxinus chinensis* subsp. *rhyrachophylla*, *Fraxinus mandshurica*, *Fraxinus nigra*, *Ilex verticillata*, *Juglans ailanthifolia*, *Juglans californica*, *Juglans cinerea*, *Juglans hindsii*, *Juglans regia*, *Liquidambar formosana*, *Liriodendron tulipifera*, *Magnolia fraseri*, *Magnolia kobus*, *Magnolia obovata*, *Magnolia officinalis*, *Malus baccata*, *Malus sylvestris*, *Nyssa sylvatica*, *Oxydendrum arboreum*, *Phellodendron amurense*, *Prunus armeniaca*, *Prunus cerasifera*, *Prunus davidiana*, *Prunus domestica*, *Prunus padus*, *Quercus acutissima*, *Quercus alba*, *Quercus aliena* var. *acutiserrata*, *Quercus bicolor*, *Quercus chenii*, *Quercus coccinea*, *Quercus douglasii*, *Quercus ellipsoidalis*, *Quercus faginea*, *Quercus falcata*, *Quercus gambelii*, *Quercus ilicifolia*, *Quercus kelloggii*, *Quercus laevis*, *Quercus macrocarpa*, *Quercus michauxii*, *Quercus mongolica*, *Quercus mongolica* subsp. *crispula*, *Quercus petraea*, *Quercus prinus*, *Quercus pubescens*, *Quercus pyrenaica*, *Quercus robur*, *Quercus serrata* subsp. *serrata*, *Quercus variabilis*, *Quercus velutina*, *Robinia neomexicana*, *Sorbus americana*, *Sorbus aria*, *Sorbus aucuparia*, *Sorbus commixta*, *Tilia americana*, *Tilia amurensis*, *Tilia cordata*, *Tilia japonica*, *Tilia mandshurica*, *Tilia mongolica*, *Tilia platyphyllos*, *Ulmus americana*, *Ulmus davidiana*, *Ulmus davidiana* var. *japonica*, *Ulmus laciniata*, *Ulmus parvifolia*

#### **Needleleaf deciduous, fast-growing**

*Larix decidua*, *Larix decidua* x *leptolepis*, *Larix kaempferi*, *Larix leptolepis*, *Larix occidentalis*, *Larix x eurolepis*, *Taxodium distichum*

#### **Needleleaf deciduous, slow-/medium-growing**

*Larix dahurica*, *Larix gmelinii*, *Larix gmelinii* var. *olgensis*, *Larix laricina*, *Larix lyallii*, *Larix olgensis*, *Larix principis-rupprechtii*, *Larix sibirica*

**Needleleaf evergreen, fast-growing**

*Abies alba*, *Abies bornmulleriana*, *Abies fraseri*, *Abies grandis*, *Cryptomeria fortunei*, *Cryptomeria japonica*, *Picea abies*, *Picea crassifolia*, *Picea glauca*, *Picea omorika*, *Picea rubens*, *Picea sitchensis*, *Pinus banksiana*, *Pinus brutia*, *Pinus contorta*, *Pinus monticola*, *Pinus muricata*, *Pinus nigra*, *Pinus nigra* var. *calabrica*, *Pinus palustris*, *Pinus pinaster*, *Pinus radiata*, *Pinus strobus*, *Pinus sylvestris*, *Pseudotsuga menziesii*, *Sequoia sempervirens*, *Thuja plicata*, *Tsuga heterophylla*

**Needleleaf evergreen, slow-/medium-growing**

*Abies amabilis*, *Abies balsamea*, *Abies concolor*, *Abies firma*, *Abies lasiocarpa*, *Abies mayriana*, *Abies nephrolepis*, *Abies sachalinensis*, *Abies sibirica*, *Cedrus deodara*, *Chamaecyparis obtusa*, *Juniperus communis*, *Juniperus depeana*, *Juniperus monosperma*, *Juniperus osteosperma*, *Juniperus oxycedrus*, *Juniperus oxycedrus* var. *oxycedrus*, *Juniperus scopulorum*, *Juniperus virginia*, *Juniperus virginiana*, *Picea engelmannii*, *Picea jezoensis*, *Picea mariana*, *Picea mariana* x *rubens*, *Picea meyeri*, *Picea obovata*, *Picea orientalis*, *Picea wilsonii*, *Pinus albicaulis*, *Pinus aristata*, *Pinus armandii*, *Pinus bungeana*, *Pinus cembra*, *Pinus densiflora*, *Pinus echinata*, *Pinus edulis*, *Pinus flexilis*, *Pinus halepensis*, *Pinus jeffreyi*, *Pinus koraiensis*, *Pinus massoniana*, *Pinus monophylla*, *Pinus pinea*, *Pinus ponderosa*, *Pinus resinosa*, *Pinus rigida*, *Pinus serotina*, *Pinus sibirica*, *Pinus strobiformis*, *Pinus tabulaeformis*, *Pinus tabuliformis*, *Pinus taeda*, *Pinus thunbergii*, *Pinus uncinata*, *Thuja occidentalis*, *Tsuga canadensis*, *Tsuga chinensis*, *Tsuga mertensiana*, *Tsuga sieboldii*

## S4 Generalized additive models

A total of 17 generalized additive models (GAMs) are implemented for each tree tissue N concentration, using different combinations of explanatory variables. While GAMs (1) – (9) consider plant trait variables, GAMs (10) – (12) consider environmental condition variables. GAMs (13) – (17) incorporate plant traits and environmental conditions:

- (1) Leaf types (LT; broadleaf deciduous, needleleaf deciduous, needleleaf evergreen)
- (2) Growth rate (GR) classes (slow-/medium growing, fast-growing)
- (3) Leaf type / growth rate (LT/GR) classes
- (4) Tree age
- (5) Tree height
- (6) Compartment biomass
- (7) LT/GR + Age
- (8) LT/GR + Height
- (9) LT/GR + Biomass
- (10) MAT + MAP
- (11) Soil N concentration
- (12) MAT + MAP + Soil N
- (13) LT/GR + Soil N
- (14) LT + MAT + MAP + Soil N
- (15) LT + Age + MAT + MAP
- (16) LT + Height + MAT + MAP
- (17) LT + Biomass + MAT + MAP

Table S1: Modelling efficiencies (MEFs) of all the 17 applied generalized additive models (GAMs) for modelling leaf N concentration using different combinations of explanatory variables. n indicates the number of available measurements for each GAM.

| GAM | Variables                       | Formula               | n    | MEF   |
|-----|---------------------------------|-----------------------|------|-------|
| (1) | Leaf Type (LT)                  | Leaf_N ~ factor(LT)   | 5944 | 0.51  |
| (2) | Growth Rate (GR)                | Leaf_N ~ factor(GR)   | 5944 | 0.032 |
| (3) | Leaf Type / Growth Rate (LT/GR) | Leaf_N ~ factor(LTGR) | 5944 | 0.524 |
| (4) | Age                             | Leaf_N ~ s(Age)       | 428  | 0.07  |
| (5) | Height                          | Leaf_N ~ s(Height)    | 416  | 0.336 |

|      |                          |                                                                                                                  |      |       |
|------|--------------------------|------------------------------------------------------------------------------------------------------------------|------|-------|
| (6)  | Biomass                  | Leaf_N ~ s(Biomass)                                                                                              | 73   | 0.368 |
| (7)  | LT/GR + Age              | Leaf_N ~ s(Age) + factor(LTGR)                                                                                   | 428  | 0.454 |
| (8)  | LT/GR + Height           | Leaf_N ~ s(Height, by = LTGR) + factor(LTGR)                                                                     | 416  | 0.743 |
| (9)  | LT/GR + Biomass          | Leaf_N ~ s(Biomass, by = LTGR)                                                                                   | 73   | 0.772 |
| (10) | MAT + MAP                | Leaf_N ~ s(MAT) + s(MAP) + te(MAT, MAP)                                                                          | 5944 | 0.134 |
| (11) | Soil N                   | Leaf_N ~ s(Soil_N)                                                                                               | 624  | 0.27  |
| (12) | MAT + MAP + Soil N       | Leaf_N ~ s(MAT) + s(MAP) + s(Soil_N) + te(MAT, MAP) + te(MAT, Soil_N) + te(MAP, Soil_N)                          | 624  | 0.516 |
| (13) | LT/GR + Soil N           | Leaf_N ~ s(Soil_N, by = LTGR)                                                                                    | 624  | 0.616 |
| (14) | LT + MAT + MAP + Soil N  | Leaf_N ~ s(MAT, by = LT) + s(MAP, by = LT) + s(Soil_N, by = LT) + factor(LT) + te(MAT, Soil_N) + te(MAP, Soil_N) | 624  | 0.698 |
| (15) | LT + Age + MAT + MAP     | Leaf_N ~ s(MAT, by = LT) + s(MAP, by = LT) + s(Age, by = LT) + factor(LT) + te(MAT, Age)                         | 428  | 0.618 |
| (16) | LT + Height + MAT + MAP  | Leaf_N ~ s(MAT, by = LT) + s(MAP, by = LT) + s(Height, by = LT) + factor(LT) + te(MAP, Height)                   | 416  | 0.761 |
| (17) | LT + Biomass + MAT + MAP | Leaf_N ~ s(MAT) + s(MAP) + s(Biomass) + factor(LT) + te(MAT, Biomass)                                            | 73   | 0.779 |

Table S2: Modelling efficiencies (MEFs) of all the 17 applied generalized additive models (GAMs) for modelling branch N concentration using different combinations of explanatory variables. n indicates the number of available measurements for each GAM.

| GAM  | Variables                       | Formula                                                         | n   | MEF   |
|------|---------------------------------|-----------------------------------------------------------------|-----|-------|
| (1)  | Leaf Type (LT)                  | Branch_N ~ factor(LT)                                           | 599 | 0.078 |
| (2)  | Growth Rate (GR)                | Branch_N ~ factor(GR)                                           | 599 | 0.019 |
| (3)  | Leaf Type / Growth Rate (LT/GR) | Branch_N ~ factor(LTGR)                                         | 599 | 0.146 |
| (4)  | Age                             | Branch_N ~ s(Age)                                               | 437 | 0.248 |
| (5)  | Height                          | Branch_N ~ s(Height)                                            | 312 | 0.041 |
| (6)  | Biomass                         | Branch_N ~ s(Biomass)                                           | 300 | 0.022 |
| (7)  | LT/GR + Age                     | Branch_N ~ s(Age, by = LTGR)                                    | 437 | 0.402 |
| (8)  | LT/GR + Height                  | Branch_N ~ s(Height, by = LTGR)                                 | 312 | 0.348 |
| (9)  | LT/GR + Biomass                 | Branch_N ~ s(Biomass, by = LTGR)                                | 300 | 0.379 |
| (10) | MAT + MAP                       | Branch_N ~ s(MAT) + s(MAP) + te(MAT, MAP)                       | 599 | 0.428 |
| (11) | Soil N                          | Branch_N ~ s(Soil_N)                                            | 201 | 0.087 |
| (12) | MAT + MAP + Soil                | Branch_N ~ s(MAT) + s(MAP) + s(Soil_N) + te(MAT, MAP) + te(MAT, | 201 | 0.692 |

|      | N                        | Soil_N)                                                                                                                 |     |       |
|------|--------------------------|-------------------------------------------------------------------------------------------------------------------------|-----|-------|
| (13) | LT/GR + Soil N           | Branch_N ~ s(Soil_N, by = LTGR)                                                                                         | 201 | 0.55  |
| (14) | LT + MAT + MAP + Soil N  | Branch_N ~ s(MAT) + s(MAP) + s(Soil_N) + factor(LT) + te(MAT, MAP) + te(MAT, Soil_N)                                    | 201 | 0.701 |
| (15) | LT + Age + MAT + MAP     | Branch_N ~ s(MAT, by = LT) + s(MAP, by = LT) + s(Age, by = LT) + factor(LT) + te(MAT, MAP) + te(MAP, Age)               | 437 | 0.599 |
| (16) | LT + Height + MAT + MAP  | Branch_N ~ s(MAT, by = LT) + s(MAP, by = LT) + s(Height, by = LT) + te(MAT, Height) + te(MAP, Height)                   | 312 | 0.573 |
| (17) | LT + Biomass + MAT + MAP | Branch_N ~ s(MAT, by = LT) + s(MAP, by = LT) + s(Biomass, by = LT) + te(MAT, MAP) + te(MAT, Biomass) + te(MAP, Biomass) | 300 | 0.702 |

Table S3: Modelling efficiencies (MEFs) of all the 17 applied generalized additive models (GAMs) for modelling stem N concentration using different combinations of explanatory variables. n indicates the number of available measurements for each GAM.

| GAM  | Variables                       | Formula                                                                                                            | n    | MEF   |
|------|---------------------------------|--------------------------------------------------------------------------------------------------------------------|------|-------|
| (1)  | Leaf Type (LT)                  | Stem_N ~ factor(LT)                                                                                                | 1048 | 0.119 |
| (2)  | Growth Rate (GR)                | Stem_N ~ factor(GR)                                                                                                | 1048 | 0     |
| (3)  | Leaf Type / Growth Rate (LT/GR) | Stem_N ~ factor(LTGR)                                                                                              | 1048 | 0.122 |
| (4)  | Age                             | Stem_N ~ s(Age)                                                                                                    | 823  | 0.366 |
| (5)  | Height                          | Stem_N ~ s(Height)                                                                                                 | 515  | 0.315 |
| (6)  | Biomass                         | Stem_N ~ s(Biomass)                                                                                                | 320  | 0.228 |
| (7)  | LT/GR + Age                     | Stem_N ~ s(Age, by = LTGR)                                                                                         | 823  | 0.605 |
| (8)  | LT/GR + Height                  | Stem_N ~ s(Height, by = LTGR) + factor(LTGR)                                                                       | 515  | 0.555 |
| (9)  | LT/GR + Biomass                 | Stem_N ~ s(Biomass, by = LTGR) + factor(LTGR)                                                                      | 320  | 0.416 |
| (10) | MAT + MAP                       | Stem_N ~ s(MAT) + s(MAP) + te(MAT, MAP)                                                                            | 1048 | 0.151 |
| (11) | Soil N                          | Stem_N ~ s(Soil_N)                                                                                                 | 323  | 0.002 |
| (12) | MAT + MAP + Soil N              | Stem_N ~ s(MAT) + s(MAP) + s(Soil_N) + te(MAT, MAP) + te(MAT, Soil_N)                                              | 323  | 0.488 |
| (13) | LT/GR + Soil N                  | Stem_N ~ s(Soil_N, by = LTGR) + factor(LTGR)                                                                       | 323  | 0.724 |
| (14) | LT + MAT + MAP + Soil N         | Stem_N ~ s(MAT, by = LT) + s(MAP, by = LT) + s(Soil_N, by = LT) + te(MAT, MAP) + te(MAT, Soil_N) + te(MAP, Soil_N) | 323  | 0.922 |
| (15) | LT + Age + MAT + MAP            | Stem_N ~ s(MAT, by = LT) + s(MAP, by = LT) + s(Age, by = LT) + te(MAT, Age)                                        | 823  | 0.682 |
| (16) | LT + Height + MAT + MAP         | Stem_N ~ s(MAT, by = LT) + s(MAP, by = LT) + s(Height, by = LT) + te(MAT, MAP) + te(MAT, Height) + te(MAP, Height) | 515  | 0.669 |
| (17) | LT + Biomass +                  | Stem_N ~ s(MAT, by = LT) + s(MAP, by = LT) + s(Biomass, by = LT) +                                                 | 320  | 0.657 |

|  |           |                                                                 |  |  |
|--|-----------|-----------------------------------------------------------------|--|--|
|  | MAT + MAP | factor(LT) + te(MAT, MAP) + te(MAT, Biomass) + te(MAP, Biomass) |  |  |
|--|-----------|-----------------------------------------------------------------|--|--|

Table S4: Modelling efficiencies (MEFs) of all the 17 applied generalized additive models (GAMs) for modelling root N concentration using different combinations of explanatory variables. n indicates the number of available measurements for each GAM.

| GAM  | Variables                       | Formula                                                                                    | n   | MEF   |
|------|---------------------------------|--------------------------------------------------------------------------------------------|-----|-------|
| (1)  | Leaf Type (LT)                  | Root_N ~ factor(LT)                                                                        | 267 | 0.118 |
| (2)  | Growth Rate (GR)                | Root_N ~ factor(GR)                                                                        | 267 | 0     |
| (3)  | Leaf Type / Growth Rate (LT/GR) | Root_N ~ factor(LTGR)                                                                      | 267 | 0.193 |
| (4)  | Age                             | Root_N ~ s(Age)                                                                            | 245 | 0.232 |
| (5)  | Height                          | Root_N ~ s(Height)                                                                         | 98  | 0.046 |
| (6)  | Biomass                         | Root_N ~ s(Biomass)                                                                        | 111 | 0.147 |
| (7)  | LT/GR + Age                     | Root_N ~ s(Age, by = LTGR) + factor(LTGR)                                                  | 245 | 0.455 |
| (8)  | LT/GR + Height                  | Root_N ~ s(Height, by = LTGR) + factor(LTGR)                                               | 98  | 0.568 |
| (9)  | LT/GR + Biomass                 | Root_N ~ s(Biomass, by = LTGR)                                                             | 111 | 0.403 |
| (10) | MAT + MAP                       | Root_N ~ s(MAT) + s(MAP) + te(MAT, MAP)                                                    | 267 | 0.352 |
| (11) | Soil N                          | Root_N ~ s(Soil_N)                                                                         | 136 | 0.552 |
| (12) | MAT + MAP + Soil N              | Root_N ~ s(MAT) + s(MAP) + s(Soil_N) + te(MAT, Soil_N) + te(MAP, Soil_N)                   | 136 | 0.862 |
| (13) | LT/GR + Soil N                  | Root_N ~ s(Soil_N, by = LTGR) + factor(LTGR)                                               | 136 | 0.826 |
| (14) | LT + MAT + MAP + Soil N         | Root_N ~ s(MAT, by = LT) + s(MAP, by = LT) + s(Soil_N, by = LT)                            | 136 | 0.871 |
| (15) | LT + Age + MAT + MAP            | Root_N ~ s(MAT, by = LT) + s(MAP, by = LT) + s(Age, by = LT) + te(MAT, MAP) + te(MAP, Age) | 245 | 0.775 |
| (16) | LT + Height + MAT + MAP         | Root_N ~ s(MAT) + s(MAP) + s(Height) + factor(LT) + te(MAT, MAP)                           | 98  | 0.757 |
| (17) | LT + Biomass + MAT + MAP        | Root_N ~ s(MAT, by = LT) + s(MAP, by = LT) + s(Biomass, by = LT) + te(MAT, MAP)            | 111 | 0.928 |



## S5 N concentration summary statistics

Table S5: Leaf N Concentration [ $\text{gN g}^{-1}$ ] summary statistics for all growth / leaf type classes.

| Leaf N Concentration [ $\text{gN g}^{-1}$ ] | 1 <sup>st</sup> quartile | Median | Mean   | 3 <sup>rd</sup> quartile |
|---------------------------------------------|--------------------------|--------|--------|--------------------------|
| Broadleaf Deciduous Fast-growing            | 0.0194                   | 0.0241 | 0.0238 | 0.0282                   |
| Broadleaf Deciduous Slow-/Medium-growing    | 0.0183                   | 0.0215 | 0.0216 | 0.0247                   |
| Needleleaf Deciduous Fast-growing           | 0.0167                   | 0.0194 | 0.0193 | 0.0213                   |
| Needleleaf Deciduous Slow-/Medium-growing   | 0.0133                   | 0.0172 | 0.0172 | 0.0211                   |
| Needleleaf Evergreen Fast-growing           | 0.0107                   | 0.0125 | 0.0126 | 0.0143                   |
| Needleleaf Evergreen Slow-/Medium-growing   | 0.0099                   | 0.0118 | 0.0122 | 0.0148                   |
| All Broadleaf Deciduous                     | 0.0185                   | 0.0222 | 0.0224 | 0.0260                   |
| All Needleleaf Deciduous                    | 0.0155                   | 0.0185 | 0.0183 | 0.0213                   |
| All Needleleaf Evergreen                    | 0.0105                   | 0.0124 | 0.0125 | 0.0144                   |
| All Fast-growing                            | 0.0118                   | 0.0144 | 0.0168 | 0.0209                   |
| All Slow-/Medium-growing                    | 0.0147                   | 0.0194 | 0.0192 | 0.0234                   |
| All                                         | 0.0124                   | 0.0167 | 0.0179 | 0.0226                   |

Table S6: Branch N Concentration [ $\text{gN g}^{-1}$ ] summary statistics for all growth / leaf type classes.

| Branch N Concentration [ $\text{gN g}^{-1}$ ] | 1 <sup>st</sup> quartile | Median | Mean   | 3 <sup>rd</sup> quartile |
|-----------------------------------------------|--------------------------|--------|--------|--------------------------|
| Broadleaf Deciduous Fast-growing              | 0.0035                   | 0.0053 | 0.0063 | 0.0076                   |
| Broadleaf Deciduous Slow-/Medium-growing      | 0.0026                   | 0.0038 | 0.0041 | 0.0053                   |
| Needleleaf Deciduous Fast-growing             | 0.0047                   | 0.0050 | 0.0053 | 0.0055                   |
| Needleleaf Deciduous Slow-/Medium-growing     | 0.0038                   | 0.0048 | 0.0044 | 0.0053                   |
| Needleleaf Evergreen Fast-growing             | 0.0024                   | 0.0033 | 0.0036 | 0.0049                   |
| Needleleaf Evergreen Slow-/Medium-growing     | 0.0020                   | 0.0027 | 0.0032 | 0.0038                   |
| All Broadleaf Deciduous                       | 0.0029                   | 0.0042 | 0.0050 | 0.0059                   |
| All Needleleaf Deciduous                      | 0.0040                   | 0.0049 | 0.0046 | 0.0053                   |
| All Needleleaf Evergreen                      | 0.0022                   | 0.0030 | 0.0035 | 0.0045                   |
| All Fast-growing                              | 0.0025                   | 0.0039 | 0.0044 | 0.0054                   |
| All Slow-/Medium-growing                      | 0.0022                   | 0.0032 | 0.0037 | 0.0049                   |
| All                                           | 0.0024                   | 0.0035 | 0.0040 | 0.0051                   |

Table S7: Stem N Concentration [gN g<sup>-1</sup>] summary statistics for all growth / leaf type classes.

| Stem N Concentration [gN g <sup>-1</sup> ] | 1 <sup>st</sup> quartile | Median | Mean   | 3 <sup>rd</sup> quartile |
|--------------------------------------------|--------------------------|--------|--------|--------------------------|
| Broadleaf Deciduous Fast-growing           | 0.0010                   | 0.0016 | 0.0023 | 0.0026                   |
| Broadleaf Deciduous Slow-/Medium-growing   | 0.0013                   | 0.0018 | 0.0021 | 0.0025                   |
| Needleleaf Deciduous Fast-growing          | 0.0006                   | 0.0007 | 0.0008 | 0.0009                   |
| Needleleaf Deciduous Slow-/Medium-growing  | 0.0009                   | 0.0010 | 0.0013 | 0.0013                   |
| Needleleaf Evergreen Fast-growing          | 0.0006                   | 0.0008 | 0.0011 | 0.0012                   |
| Needleleaf Evergreen Slow-/Medium-growing  | 0.0003                   | 0.0006 | 0.0009 | 0.0010                   |
| All Broadleaf Deciduous                    | 0.0012                   | 0.0017 | 0.0022 | 0.0025                   |
| All Needleleaf Deciduous                   | 0.0008                   | 0.0010 | 0.0013 | 0.0013                   |
| All Needleleaf Evergreen                   | 0.0005                   | 0.0008 | 0.0010 | 0.0011                   |
| All Fast-growing                           | 0.0007                   | 0.0010 | 0.0014 | 0.0015                   |
| All Slow-/Medium-growing                   | 0.0007                   | 0.0010 | 0.0014 | 0.0017                   |
| All                                        | 0.0007                   | 0.0010 | 0.0014 | 0.0016                   |

Table S8: Root N Concentration [gN g<sup>-1</sup>] summary statistics for all growth / leaf type classes.

| Root N Concentration [gN g <sup>-1</sup> ] | 1 <sup>st</sup> quartile | Median | Mean   | 3 <sup>rd</sup> quartile |
|--------------------------------------------|--------------------------|--------|--------|--------------------------|
| Broadleaf Deciduous Fast-growing           | 0.0052                   | 0.0078 | 0.0094 | 0.0111                   |
| Broadleaf Deciduous Slow-/Medium-growing   | 0.0035                   | 0.0045 | 0.0056 | 0.0068                   |
| Needleleaf Deciduous Fast-growing          | 0.0026                   | 0.0032 | 0.0032 | 0.0033                   |
| Needleleaf Deciduous Slow-/Medium-growing  | 0.0058                   | 0.0074 | 0.0073 | 0.0093                   |
| Needleleaf Evergreen Fast-growing          | 0.0015                   | 0.0033 | 0.0045 | 0.0075                   |
| Needleleaf Evergreen Slow-/Medium-growing  | 0.0016                   | 0.0046 | 0.0045 | 0.0062                   |
| All Broadleaf Deciduous                    | 0.0039                   | 0.0064 | 0.0077 | 0.0089                   |
| All Needleleaf Deciduous                   | 0.0051                   | 0.0071 | 0.0070 | 0.0091                   |
| All Needleleaf Evergreen                   | 0.0015                   | 0.0038 | 0.0045 | 0.0070                   |
| All Fast-growing                           | 0.0024                   | 0.0052 | 0.0060 | 0.0079                   |
| All Slow-/Medium-growing                   | 0.0038                   | 0.0061 | 0.0062 | 0.0085                   |
| All                                        | 0.0033                   | 0.0060 | 0.0061 | 0.0083                   |

## S6 Significance of differences between leaf, branch, stem, and root N concentration

The significance of differences between leaf, branch, stem, and root N concentration is quantified by the p-values of pairwise t-tests (Table S9).

Table S9: P-values of pairwise t-tests of N concentration in all compartments.

| p-value                | Leaf N Concentration | Branch N Concentration | Stem N Concentration |
|------------------------|----------------------|------------------------|----------------------|
| Branch N Concentration | $< 2*10^{-16}$       | –                      | –                    |
| Stem N Concentration   | $< 2*10^{-16}$       | $< 2*10^{-16}$         | –                    |
| Root N Concentration   | $< 2*10^{-16}$       | $3.2*10^{-6}$          | $< 2*10^{-16}$       |

## S7 Differences between tree species

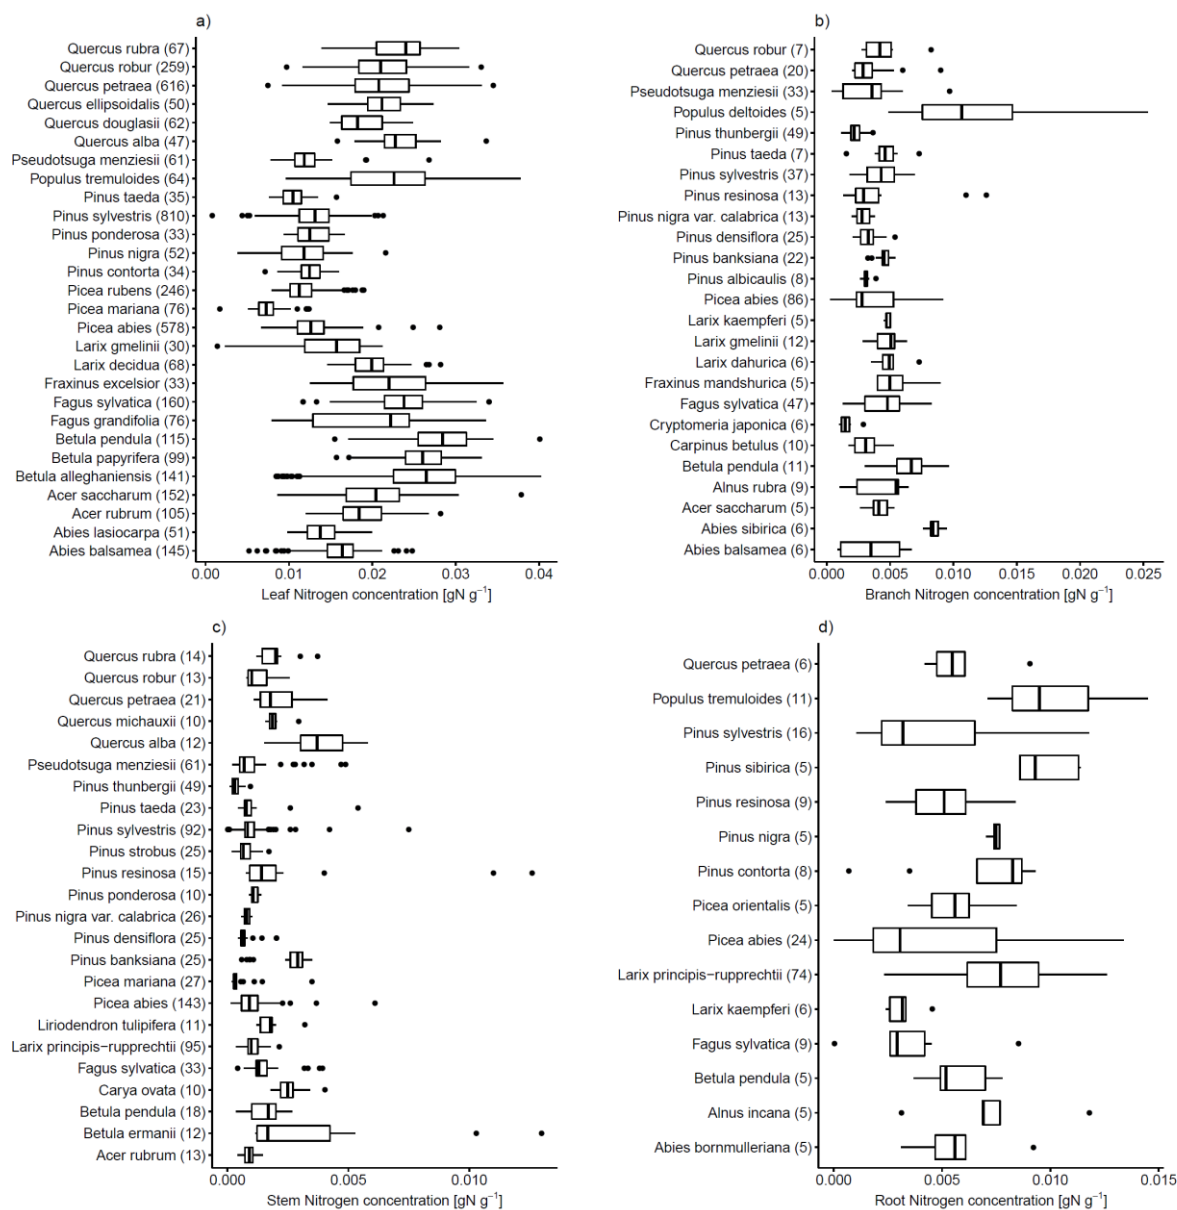

Fig. S1: a) Leaf, b) branch, c) stem and d) root N concentration [ $\text{gN g}^{-1}$ ] for the most common tree species in the database. Only tree species with at least 30 in case of leaf, 10 in case of stem, and 5 in case of branch and root N concentration measurements are included in this figure.

Table S10: Leaf N Concentration [ $\text{gN g}^{-1}$ ] summary statistics for all species with at least 30 measurements.

| Leaf N Concentration [ $\text{gN g}^{-1}$ ] | 1 <sup>st</sup> quartile | Median | Mean   | 3 <sup>rd</sup> quartile |
|---------------------------------------------|--------------------------|--------|--------|--------------------------|
| <i>Abies balsamea</i>                       | 0.0146                   | 0.0164 | 0.0159 | 0.0177                   |
| <i>Abies lasiocarpa</i>                     | 0.0122                   | 0.0138 | 0.0139 | 0.0155                   |
| <i>Acer rubrum</i>                          | 0.0165                   | 0.0184 | 0.0189 | 0.0211                   |
| <i>Acer saccharum</i>                       | 0.0169                   | 0.0204 | 0.0197 | 0.0232                   |

|                       |        |        |        |        |
|-----------------------|--------|--------|--------|--------|
| Betula alleghaniensis | 0.0225 | 0.0265 | 0.0248 | 0.03   |
| Betula papyrifera     | 0.024  | 0.026  | 0.0258 | 0.0283 |
| Betula pendula        | 0.0255 | 0.0284 | 0.0281 | 0.0313 |
| Fagus grandifolia     | 0.0129 | 0.0222 | 0.02   | 0.0244 |
| Fagus sylvatica       | 0.0215 | 0.0238 | 0.0235 | 0.026  |
| Fraxinus excelsior    | 0.0177 | 0.022  | 0.0225 | 0.0264 |
| Larix decidua         | 0.018  | 0.02   | 0.0198 | 0.0214 |
| Larix gmelinii        | 0.0119 | 0.0157 | 0.0148 | 0.0185 |
| Picea abies           | 0.011  | 0.0126 | 0.0127 | 0.0142 |
| Picea mariana         | 0.0064 | 0.0072 | 0.0075 | 0.0081 |
| Picea rubens          | 0.0101 | 0.0113 | 0.0116 | 0.0127 |
| Pinus contorta        | 0.0115 | 0.0125 | 0.0124 | 0.0137 |
| Pinus nigra           | 0.0091 | 0.0118 | 0.0115 | 0.0141 |
| Pinus ponderosa       | 0.0111 | 0.0125 | 0.0128 | 0.0148 |
| Pinus sylvestris      | 0.0112 | 0.0132 | 0.0131 | 0.0148 |
| Pinus taeda           | 0.0093 | 0.0105 | 0.0105 | 0.0115 |
| Populus tremuloides   | 0.0174 | 0.0226 | 0.0223 | 0.0263 |
| Pseudotsuga menziesii | 0.0107 | 0.0118 | 0.0122 | 0.0131 |
| Quercus alba          | 0.0215 | 0.0228 | 0.0231 | 0.0252 |
| Quercus douglasii     | 0.0163 | 0.0182 | 0.0189 | 0.0212 |
| Quercus ellipsoidalis | 0.0194 | 0.0212 | 0.0214 | 0.0233 |
| Quercus petraea       | 0.0179 | 0.0208 | 0.0211 | 0.0244 |
| Quercus robur         | 0.0184 | 0.021  | 0.0213 | 0.0241 |
| Quercus rubra         | 0.0205 | 0.024  | 0.0232 | 0.0257 |

Table S11: Branch N Concentration [ $\text{gN g}^{-1}$ ] summary statistics for all species with at least 5 measurements.

| Branch N Concentration [ $\text{gN g}^{-1}$ ] | 1 <sup>st</sup> quartile | Median | Mean   | 3 <sup>rd</sup> quartile |
|-----------------------------------------------|--------------------------|--------|--------|--------------------------|
| Abies balsamea                                | 0.0011                   | 0.0035 | 0.0036 | 0.0058                   |
| Abies sibirica                                | 0.0082                   | 0.0084 | 0.0085 | 0.0088                   |
| Acer saccharum                                | 0.0037                   | 0.0041 | 0.0041 | 0.0048                   |
| Alnus rubra                                   | 0.0024                   | 0.0055 | 0.0044 | 0.0057                   |

|                            |        |        |        |        |
|----------------------------|--------|--------|--------|--------|
| Betula pendula             | 0.0055 | 0.0067 | 0.0066 | 0.0075 |
| Carpinus betulus           | 0.0022 | 0.0031 | 0.0032 | 0.0038 |
| Cryptomeria japonica       | 0.0012 | 0.0015 | 0.0016 | 0.0018 |
| Fagus sylvatica            | 0.003  | 0.0048 | 0.0045 | 0.0058 |
| Fraxinus mandshurica       | 0.004  | 0.005  | 0.0056 | 0.006  |
| Larix dahurica             | 0.0044 | 0.0049 | 0.005  | 0.0052 |
| Larix gmelinii             | 0.004  | 0.0051 | 0.0048 | 0.0054 |
| Larix kaempferi            | 0.0047 | 0.0047 | 0.0048 | 0.005  |
| Picea abies                | 0.0024 | 0.0028 | 0.0036 | 0.0053 |
| Pinus albicaulis           | 0.003  | 0.003  | 0.0031 | 0.0032 |
| Pinus banksiana            | 0.0044 | 0.0046 | 0.0046 | 0.0049 |
| Pinus densiflora           | 0.0027 | 0.0033 | 0.0033 | 0.0037 |
| Pinus nigra var. calabrica | 0.0024 | 0.0028 | 0.0029 | 0.0034 |
| Pinus resinosa             | 0.0023 | 0.0029 | 0.0043 | 0.0041 |
| Pinus sylvestris           | 0.0032 | 0.0043 | 0.0043 | 0.0053 |
| Pinus taeda                | 0.0042 | 0.0046 | 0.0046 | 0.0052 |
| Pinus thunbergii           | 0.0019 | 0.0022 | 0.0023 | 0.0026 |
| Populus deltoides          | 0.0076 | 0.0107 | 0.0126 | 0.0147 |
| Pseudotsuga menziesii      | 0.0013 | 0.0036 | 0.0034 | 0.0043 |
| Quercus petraea            | 0.0022 | 0.0029 | 0.0034 | 0.0036 |
| Quercus robur              | 0.0031 | 0.0042 | 0.0045 | 0.0051 |

Table S12: Stem N Concentration [ $\text{gN g}^{-1}$ ] summary statistics for all species with at least 10 measurements.

| Stem N Concentration [ $\text{gN g}^{-1}$ ] | 1 <sup>st</sup> quartile | Median | Mean   | 3 <sup>rd</sup> quartile |
|---------------------------------------------|--------------------------|--------|--------|--------------------------|
| Acer rubrum                                 | 0.0007                   | 0.0009 | 0.0009 | 0.001                    |
| Betula ermanii                              | 0.0012                   | 0.0017 | 0.0037 | 0.0042                   |
| Betula pendula                              | 0.001                    | 0.0017 | 0.0015 | 0.002                    |
| Carya ovata                                 | 0.0022                   | 0.0025 | 0.0026 | 0.0027                   |
| Fagus sylvatica                             | 0.0012                   | 0.0013 | 0.0016 | 0.0016                   |
| Larix principis-rupprechtii                 | 0.0009                   | 0.001  | 0.0011 | 0.0012                   |
| Liriodendron tulipifera                     | 0.0014                   | 0.0018 | 0.0018 | 0.0018                   |

|                                          |        |        |        |        |
|------------------------------------------|--------|--------|--------|--------|
| <i>Picea abies</i>                       | 0.0006 | 0.0009 | 0.001  | 0.0013 |
| <i>Picea mariana</i>                     | 0.0003 | 0.0003 | 0.0005 | 0.0004 |
| <i>Pinus banksiana</i>                   | 0.0026 | 0.0029 | 0.0025 | 0.0031 |
| <i>Pinus densiflora</i>                  | 0.0006 | 0.0006 | 0.0008 | 0.0007 |
| <i>Pinus nigra</i> var. <i>calabrica</i> | 0.0007 | 0.0008 | 0.0008 | 0.0009 |
| <i>Pinus ponderosa</i>                   | 0.001  | 0.0011 | 0.0011 | 0.0012 |
| <i>Pinus resinosa</i>                    | 0.0009 | 0.0014 | 0.0029 | 0.002  |
| <i>Pinus strobus</i>                     | 0.0005 | 0.0007 | 0.0008 | 0.0009 |
| <i>Pinus sylvestris</i>                  | 0.0007 | 0.0008 | 0.001  | 0.0011 |
| <i>Pinus taeda</i>                       | 0.0007 | 0.0008 | 0.0011 | 0.001  |
| <i>Pinus thunbergii</i>                  | 0.0002 | 0.0003 | 0.0003 | 0.0004 |
| <i>Pseudotsuga menziesii</i>             | 0.0005 | 0.0007 | 0.001  | 0.0011 |
| <i>Quercus alba</i>                      | 0.003  | 0.0037 | 0.0039 | 0.0048 |
| <i>Quercus michauxii</i>                 | 0.0017 | 0.0019 | 0.0019 | 0.002  |
| <i>Quercus petraea</i>                   | 0.0014 | 0.0018 | 0.0022 | 0.0027 |
| <i>Quercus robur</i>                     | 0.0009 | 0.001  | 0.0013 | 0.0016 |
| <i>Quercus rubra</i>                     | 0.0014 | 0.002  | 0.002  | 0.0021 |

Table S13: Root N Concentration [ $\text{gN g}^{-1}$ ] summary statistics for all species with at least 5 measurements.

| Root N Concentration [ $\text{gN g}^{-1}$ ] | 1 <sup>st</sup> quartile | Median | Mean   | 3 <sup>rd</sup> quartile |
|---------------------------------------------|--------------------------|--------|--------|--------------------------|
| <i>Abies bornmulleriana</i>                 | 0.0047                   | 0.0056 | 0.0057 | 0.0061                   |
| <i>Alnus incana</i>                         | 0.0069                   | 0.0069 | 0.0073 | 0.0077                   |
| <i>Betula pendula</i>                       | 0.0049                   | 0.0052 | 0.0057 | 0.007                    |
| <i>Fagus sylvatica</i>                      | 0.0026                   | 0.0029 | 0.0035 | 0.0042                   |
| <i>Larix kaempferi</i>                      | 0.0026                   | 0.0032 | 0.0032 | 0.0033                   |
| <i>Larix principis-rupprechtii</i>          | 0.0062                   | 0.0077 | 0.0077 | 0.0095                   |
| <i>Picea abies</i>                          | 0.0018                   | 0.0031 | 0.0046 | 0.0075                   |
| <i>Picea orientalis</i>                     | 0.0045                   | 0.0056 | 0.0057 | 0.0062                   |
| <i>Pinus contorta</i>                       | 0.0066                   | 0.0083 | 0.0069 | 0.0087                   |
| <i>Pinus nigra</i>                          | 0.0074                   | 0.0075 | 0.0074 | 0.0077                   |
| <i>Pinus resinosa</i>                       | 0.0038                   | 0.0051 | 0.0051 | 0.0061                   |

|                     |        |        |        |        |
|---------------------|--------|--------|--------|--------|
| Pinus sibirica      | 0.0086 | 0.0093 | 0.0098 | 0.0113 |
| Pinus sylvestris    | 0.0022 | 0.0032 | 0.0043 | 0.0065 |
| Populus tremuloides | 0.0082 | 0.0095 | 0.0102 | 0.0118 |
| Quercus petraea     | 0.0048 | 0.0055 | 0.0058 | 0.0061 |



## S8 Partial correlations

**Table S14: Partial correlation (in brackets: respective p-values) between leaf, branch, stem, and root N and tree age, mean annual temperature (MAT), mean annual precipitation sum (MAP), and soil N concentration, controlled for the other respective explanatory variables, and for leaf types (BD: broadleaf deciduous, ND: needleleaf deciduous, NE: needleleaf evergreen) separately. In some cases, not enough measurements are available (-).**

| Partial correlation (p-value)   | Leaf N                          | Branch N                        | Stem N                          | Root N                         |
|---------------------------------|---------------------------------|---------------------------------|---------------------------------|--------------------------------|
| Age (controlled for MAT); BD    | 0.056 (0.487)                   | -0.327 (0.004)                  | -0.380 (0.001)                  | -0.522 (0.005)                 |
| Age (controlled for MAT); ND    | -0.322 (0.335)                  | -0.175 (0.392)                  | -0.091 (0.316)                  | -0.014 (0.897)                 |
| Age (controlled for MAT); NE    | 0.313 (0.092)                   | -0.160 (0.030)                  | -0.151 (0.013)                  | -0.063 (0.615)                 |
| Age (controlled for MAP); BD    | -0.036 (0.576)                  | -0.322 (0.003)                  | 0.072 (0.364)                   | -0.465 (0.015)                 |
| Age (controlled for MAP); ND    | -0.351 (0.219)                  | -0.041 (0.841)                  | -0.069 (0.448)                  | 0.082 (0.456)                  |
| Age (controlled for MAP); NE    | -0.255 (0.174)                  | 0.109 (0.121)                   | -0.022 (0.703)                  | -0.134 (0.254)                 |
| Age (controlled for Soil N); BD | -0.160 (0.151)                  | -0.389 (0.004)                  | -0.438 ( $2.7 \cdot 10^{-4}$ )  | -0.579 (0.002)                 |
| Age (controlled for Soil N); ND | -                               | -0.187 (0.444)                  | -0.441 ( $1.2 \cdot 10^{-5}$ )  | 0.289 (0.009)                  |
| Age (controlled for Soil N); NE | -                               | -0.015 (0.914)                  | -0.146 (0.148)                  | 0.113 (0.636)                  |
| MAT (controlled for Age); BD    | -0.286 ( $2.8 \cdot 10^{-4}$ )  | 0.201 (0.086)                   | 0.273 (0.024)                   | 0.289 (0.143)                  |
| MAT (controlled for Age); ND    | 0.120 (0.726)                   | 0.033 (0.871)                   | -0.143 (0.117)                  | 0.278 (0.010)                  |
| MAT (controlled for Age); NE    | 0.552 (0.002)                   | -0.469 ( $1.6 \cdot 10^{-11}$ ) | -0.385 ( $5.6 \cdot 10^{-11}$ ) | 0.101 (0.418)                  |
| MAT (controlled for MAP); BD    | -0.185 ( $2.8 \cdot 10^{-13}$ ) | 0.316 ( $3.3 \cdot 10^{-4}$ )   | 0.236 (0.013)                   | 0.448 (0.005)                  |
| MAT (controlled for MAP); ND    | 0.040 (0.753)                   | -0.289 (0.136)                  | -0.018 (0.847)                  | -0.089 (0.419)                 |
| MAT (controlled for MAP); NE    | 0.121 ( $1.6 \cdot 10^{-5}$ )   | -0.142 (0.048)                  | -0.247 ( $1.2 \cdot 10^{-5}$ )  | 0.157 (0.180)                  |
| MAT (controlled for Soil N); BD | -0.182 ( $3.2 \cdot 10^{-4}$ )  | 0.367 (0.005)                   | 0.146 (0.326)                   | 0.749 (0.020)                  |
| MAT (controlled for Soil N); ND | -0.044 (0.876)                  | -0.380 (0.120)                  | -0.556 ( $1.3 \cdot 10^{-8}$ )  | 0.159 (0.159)                  |
| MAT (controlled for Soil N); NE | 0.044 (0.592)                   | -0.034 (0.834)                  | -0.207 (0.101)                  | 0.170 (0.598)                  |
| MAP (controlled for Age); BD    | 0.072 (0.268)                   | -0.221 (0.043)                  | -0.038 (0.629)                  | -0.255 (0.199)                 |
| MAP (controlled for Age); ND    | 0.753 (0.002)                   | 0.319 (0.112)                   | -0.127 (0.163)                  | 0.479 ( $3.5 \cdot 10^{-6}$ )  |
| MAP (controlled for Age); NE    | 0.234 (0.214)                   | -0.465 ( $2.7 \cdot 10^{-12}$ ) | -0.179 (0.002)                  | -0.116 (0.326)                 |
| MAP (controlled for MAT); BD    | -0.067 (0.008)                  | -0.311 ( $4.2 \cdot 10^{-4}$ )  | -0.215 (0.023)                  | -0.504 (0.001)                 |
| MAP (controlled for MAT); ND    | 0.298 (0.018)                   | 0.437 (0.020)                   | -0.026 (0.773)                  | 0.408 ( $1.1 \cdot 10^{-4}$ )  |
| MAP (controlled for MAT); NE    | 0.317 ( $< 2 \cdot 10^{-16}$ )  | -0.269 ( $1.4 \cdot 10^{-4}$ )  | -0.057 (0.320)                  | -0.125 (0.287)                 |
| MAP (controlled for Soil N); BD | -0.236 ( $2.7 \cdot 10^{-6}$ )  | -0.192 (0.123)                  | -0.073 (0.584)                  | -0.838 (0.005)                 |
| MAP (controlled for Soil N); ND | -0.082 (0.771)                  | 0.274 (0.271)                   | -0.342 ( $9.8 \cdot 10^{-4}$ )  | 0.226 (0.044)                  |
| MAP (controlled for Soil N); NE | 0.071 (0.390)                   | -0.491 (0.001)                  | 0.053 (0.677)                   | -0.055 (0.858)                 |
| Soil N (controlled for Age); BD | -0.120 (0.282)                  | -0.200 (0.156)                  | -0.235 (0.059)                  | 0.540 (0.004)                  |
| Soil N (controlled for Age); ND | -                               | -0.198 (0.417)                  | -0.022 (0.836)                  | -0.466 ( $1.3 \cdot 10^{-5}$ ) |
| Soil N (controlled for Age); NE | -                               | 0.118 (0.394)                   | 0.239 (0.017)                   | 0.186 (0.432)                  |
| Soil N (controlled for MAT); BD | 0.006 (0.905)                   | -0.066 (0.628)                  | -0.059 (0.694)                  | 0.168 (0.666)                  |

|                                 |               |                |                                |                                |
|---------------------------------|---------------|----------------|--------------------------------|--------------------------------|
| Soil N (controlled for MAT); ND | 0.062 (0.825) | -0.344 (0.162) | -0.476 (2.2*10 <sup>-6</sup> ) | -0.421 (1.0*10 <sup>-4</sup> ) |
| Soil N (controlled for MAT); NE | 0.061 (0.461) | 0.054 (0.739)  | -0.024 (0.853)                 | -0.261 (0.413)                 |
| Soil N (controlled for MAP); BD | 0.058 (0.253) | -0.207 (0.095) | -0.181 (0.170)                 | 0.825 (0.006)                  |
| Soil N (controlled for MAP); ND | 0.076 (0.788) | -0.079 (0.757) | -0.201 (0.058)                 | -0.134 (0.238)                 |
| Soil N (controlled for MAP); NE | 0.054 (0.517) | 0.109 (0.504)  | -0.034 (0.791)                 | -0.036 (0.906)                 |

## S9 Relationships between leaf N concentrations and season and needle age

We collect information on the measurement month-of-the-year (MOY) as far as this information is available from the compiled studies and the studies contained in the TRY and BAAD databases. In this additional analysis, we focus on leaf N concentration measurements, because leaf N concentrations should be more strongly affected by seasonal variations compared to the other investigated tissues. The relation between leaf N concentrations and measurement MOY for broadleaf deciduous (BD), needleleaf deciduous (ND) and needleleaf evergreen (NE) trees is shown in Fig. S2. We find that

1. the vast majority of measurements has been taken during the summer season (June – September), and
2. there is no clear pattern of lower leaf N concentrations outside the summer season evident in this data.

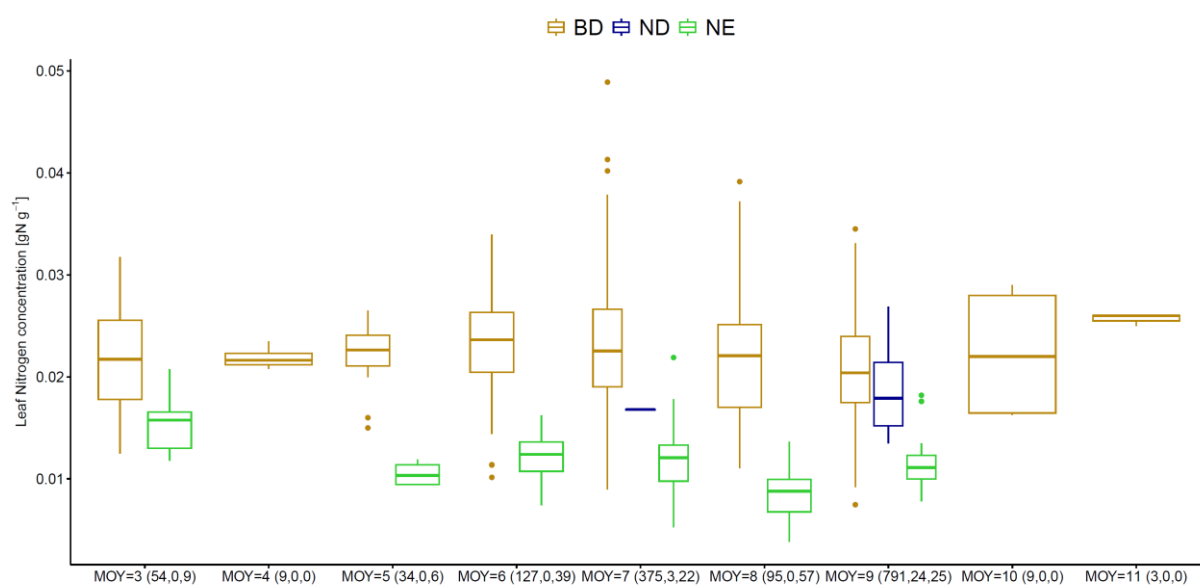

Fig. S2: Relation between leaf N concentrations and measurement month-of-the-year (MOY) for broadleaf deciduous (BD), needleleaf deciduous (ND) and needleleaf evergreen (NE) trees (number of observations for each leaf type in brackets).

We also quantify the significance of differences in leaf N concentrations between different measurement MOY by the p-values of pairwise t-tests. For BD trees, in no case we find significant differences between consecutive months at the 5% level. For NE trees, leaf N concentrations are, for instance, significantly different at the 5% level between July and August and between August and September. However, these differences show contradictory trends and are based on a limited number of measurements, and thus do not show a clear

relation between leaf N concentrations and the phenological season. We conclude that our results are not strongly affected by seasonal variations in tissue N concentrations.

In addition, we collect information on needle age as far as available. The relation between leaf N concentrations and needle age for NE trees is shown in Fig. S3. Although the median of the leaf N concentration of 1-year old needles is lower than that of current year needles, again we find no significant difference at the 5% level related to needle age. Based on the few measurements where we have information on needle age, we cannot detect that needle age would strongly affect our results.

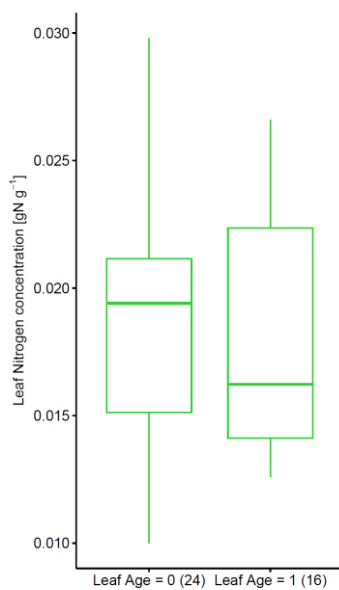

Fig. S3: Relation between leaf N concentrations and needle age for NE trees (number of observations for each leaf type in brackets).

## S10 Aridity Index

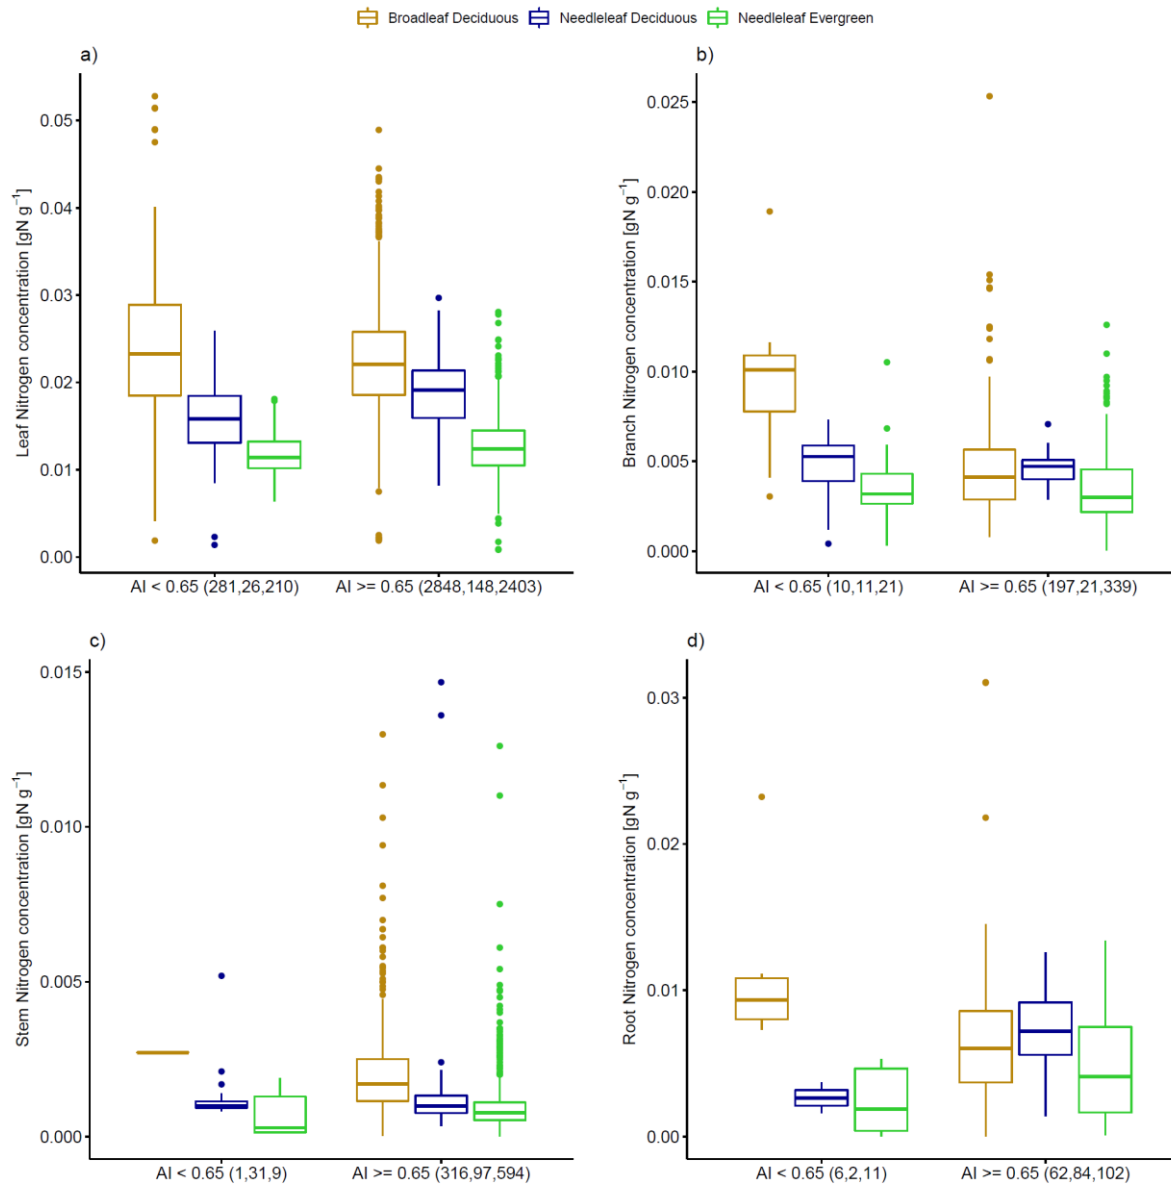

Fig. S4: The variation in a) leaf, b) branch, c) stem, and d) root N concentration for aridity index (AI) classes (AI < 0.65 vs. AI ≥ 0.65) and for leaf types (broadleaf deciduous, needleleaf deciduous, needleleaf evergreen) separately. The number of observations in each climatic class and for each leaf type is stated in brackets. The box-whisker plots show the median and the interquartile range of values. The whiskers extend up to the most extreme data point which is no more than 1.5 times the interquartile range away from the box. Outliers are drawn as points.

## S11 Q-Q plots

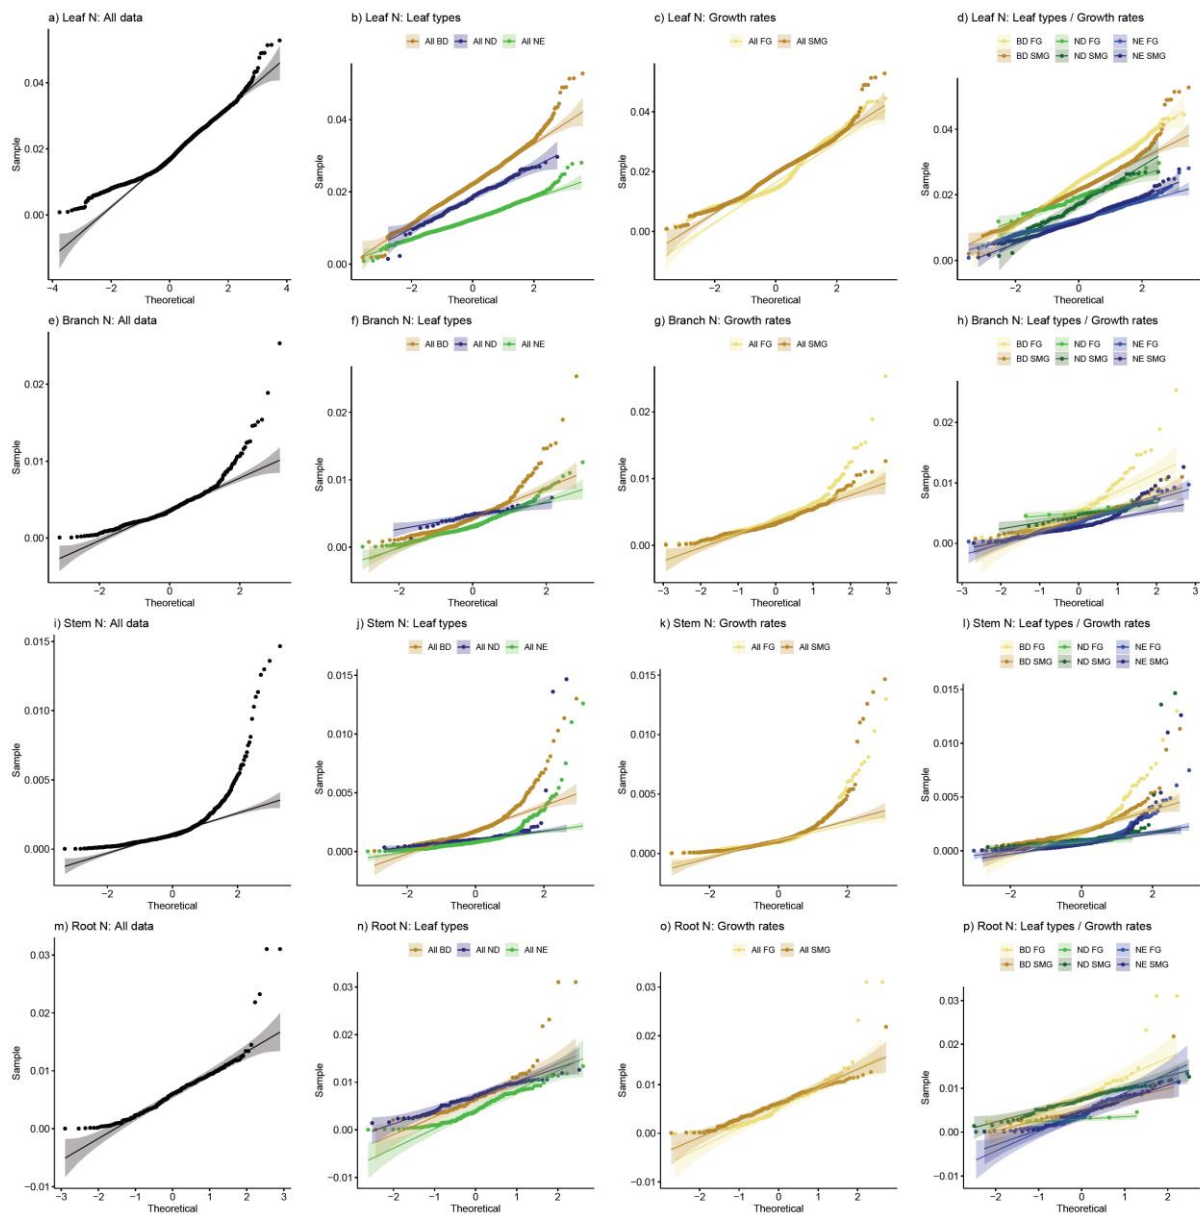

Fig. S5: Q-Q plots comparing the distributions of a-d) leaf, e-h) branch, i-l) stem, and m-p) root N concentration measurements with a standard normal distribution for leaf types and growth classes (BD = broadleaf deciduous, ND = needleleaf deciduous, NE = needleleaf evergreen, SMG = slow-/medium-growing, FG = fast-growing) separately. The straight line visualizes perfect normality, the shaded area shows 95 % confidence intervals.

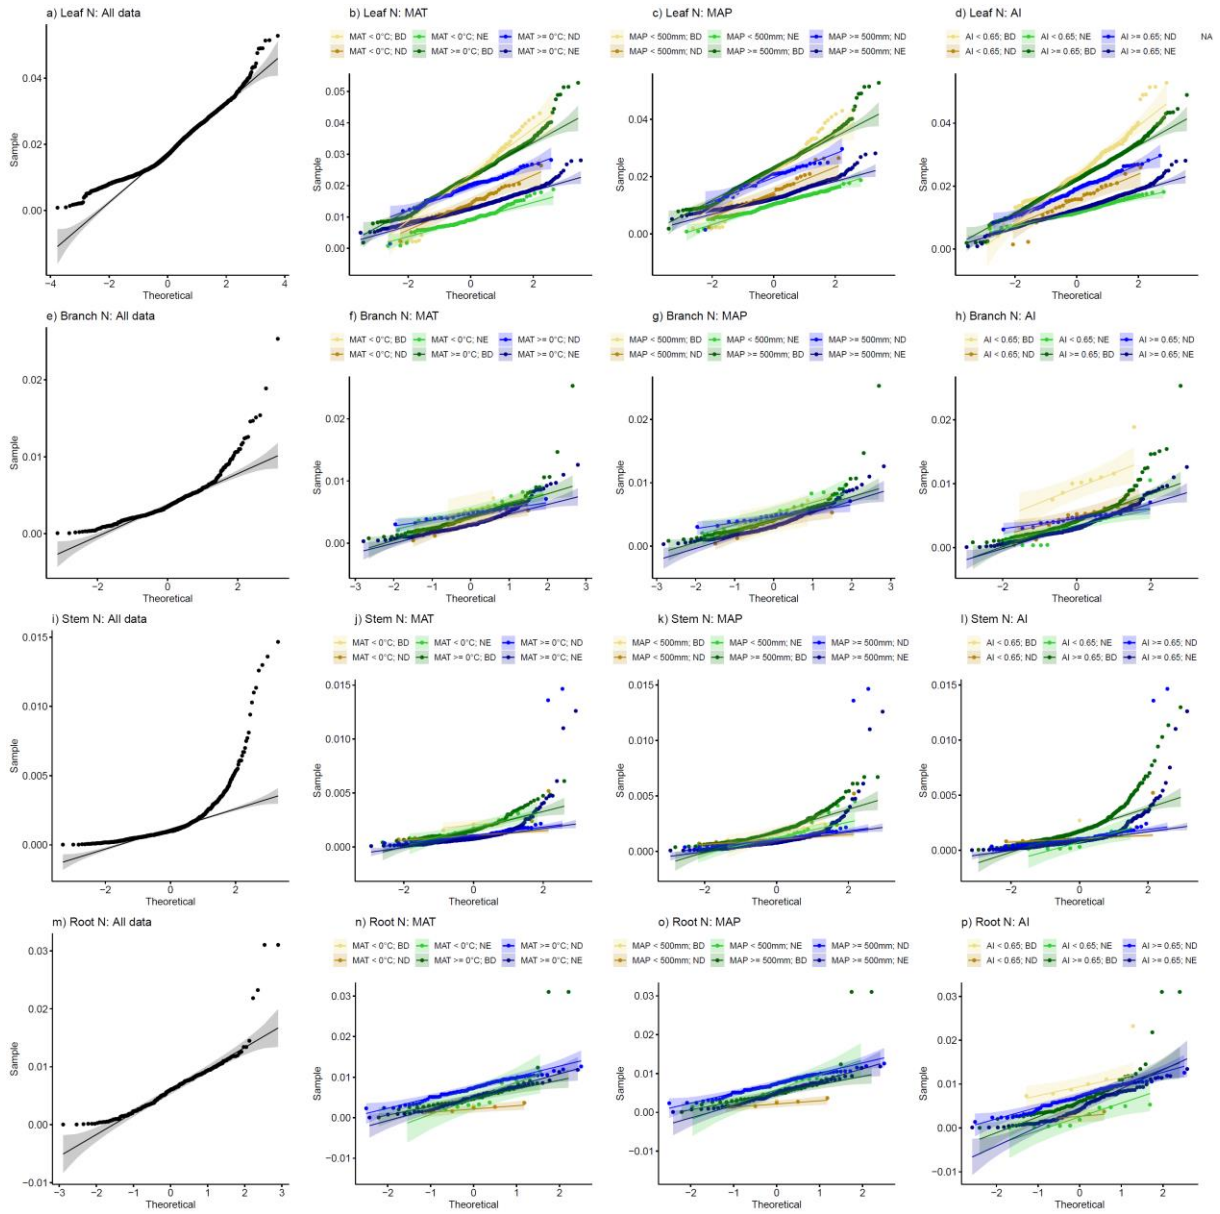

Fig. S6: Q-Q plots comparing the distributions of a-d) leaf, e-h) branch, i-l) stem, and m-p) root N concentration measurements with a standard normal distribution for mean annual temperature (MAT) classes ( $\text{MAT} < 0^\circ\text{C}$  vs.  $\text{MAT} \geq 0^\circ\text{C}$ ), mean annual precipitation sum (MAP) classes ( $\text{MAP} < 500\text{mm}$  vs.  $\text{MAP} \geq 500\text{mm}$ ), aridity index (AI) classes ( $\text{AI} < 0.65$  vs.  $\text{AI} \geq 0.65$ ) and for leaf types (BD = broadleaf deciduous, ND = needleleaf deciduous, NE = needleleaf evergreen) separately. The straight line visualizes perfect normality, the shaded area shows 95 % confidence intervals.

## S12 Residual plots

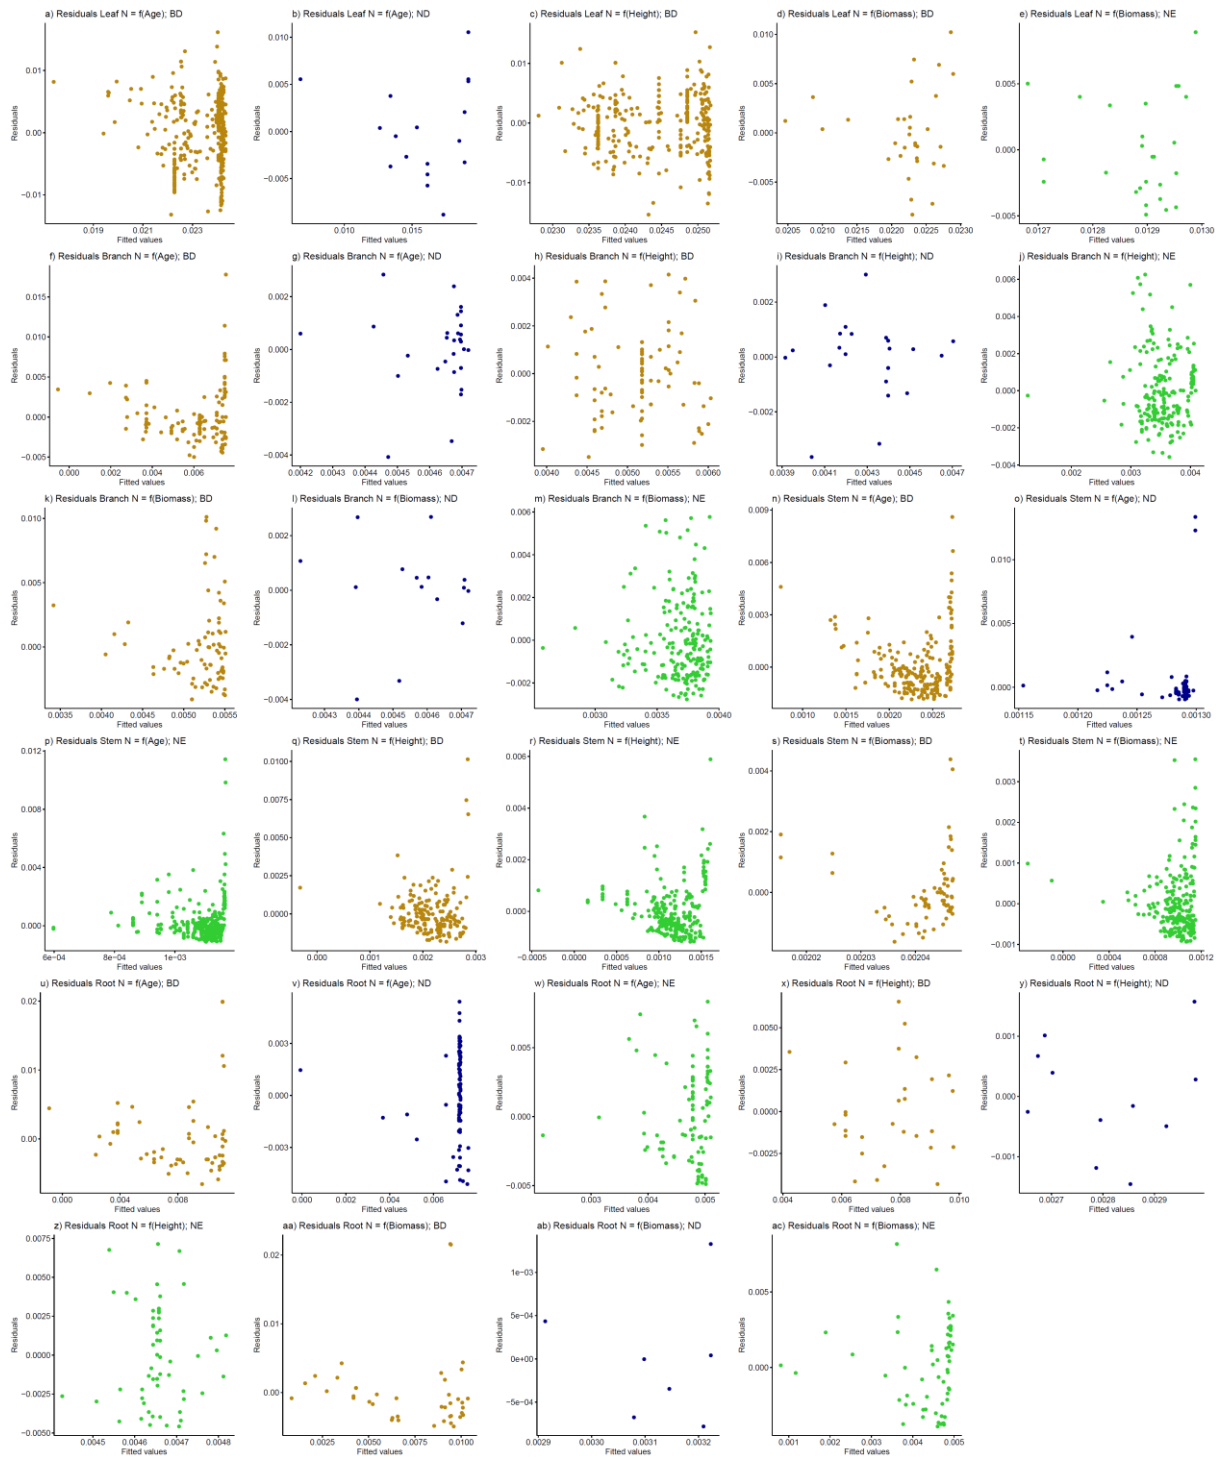

Fig. S7: Residuals from the fitted linear models (shown in Fig. 2) between a-e) leaf, f-m) branch, n-t) stem, and u-ac) root N concentration and tree age, tree height, and compartment biomass for leaf types (BD = broadleaf deciduous, ND = needleleaf deciduous, NE = needleleaf evergreen) separately.



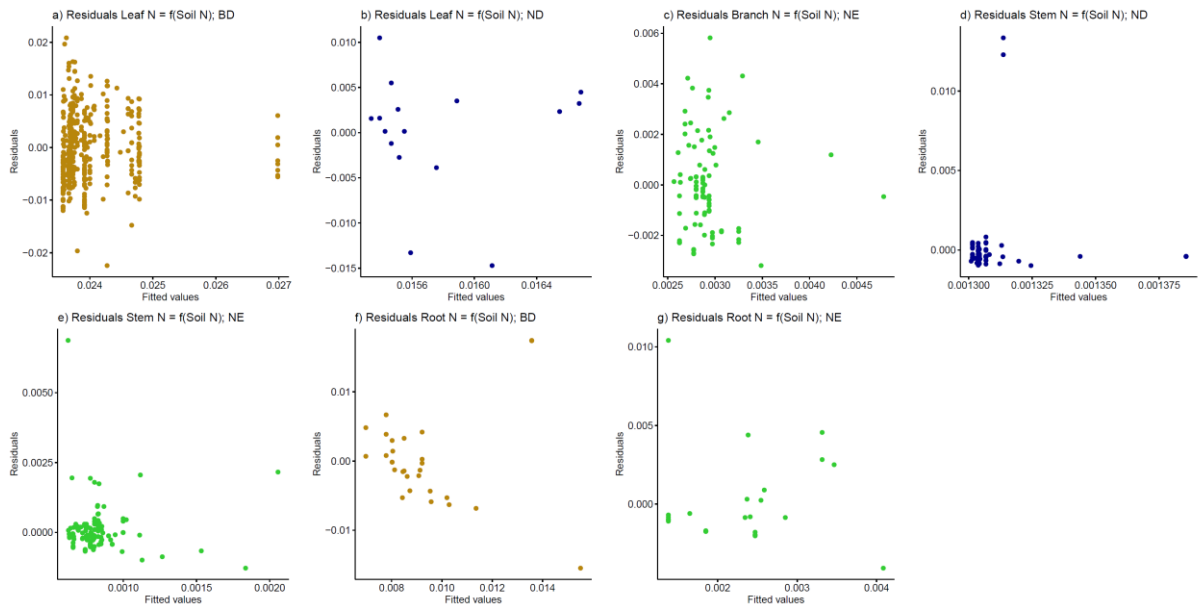

Fig. S8: Residuals from the fitted linear models (shown in Fig. 5) between a-b) leaf, c) branch, d-e) stem, and f-g) root N concentration and soil N concentration for leaf types (BD = broadleaf deciduous, ND = needleleaf deciduous, NE = needleleaf evergreen) separately.
